# Supplementary material
Source: PubMed Central journal article supplement (PMC8206162)
Supplement: mmc4.pdf [file mmc4.pdf]

# Heterozygous *ANKRD17* loss-of-function variants cause a syndrome with intellectual disability, speech delay, and dysmorphism

Maya Chopra,<sup>1,2,3,59,\*</sup> Meriel McEntagart,<sup>4</sup> Jill Clayton-Smith,<sup>5,6</sup> Konrad Platzer,<sup>7</sup> Anju Shukla,<sup>8</sup> Katta M. Girisha,<sup>8</sup> Anupriya Kaur,<sup>9</sup> Parneet Kaur,<sup>8</sup> Rolph Pfundt,<sup>10</sup> Hermine Veenstra-Knol,<sup>11</sup> Grazia M.S. Mancini,<sup>12</sup> Gerarda Cappuccio,<sup>13,14</sup> Nicola Brunetti-Pierri,<sup>13,14</sup> Fanny Kortüm,<sup>15</sup> Maja Hempel,<sup>15</sup> Jonas Denecke,<sup>15</sup> Anna Lehman,<sup>16</sup> CAUSES Study,<sup>16</sup> Tjitske Kleefstra,<sup>10</sup> Kyra E. Stuurman,<sup>12</sup> Martina Wilke,<sup>12</sup> Michelle L. Thompson,<sup>17</sup> E. Martina Bebin,<sup>18</sup>

(Author list continued on next page)

## Summary

*ANKRD17* is an ankyrin repeat-containing protein thought to play a role in cell cycle progression, whose ortholog in *Drosophila* functions in the Hippo pathway as a co-factor of Yorkie. Here, we delineate a neurodevelopmental disorder caused by *de novo* heterozygous *ANKRD17* variants. The mutational spectrum of this cohort of 34 individuals from 32 families is highly suggestive of haploinsufficiency as the underlying mechanism of disease, with 21 truncating or essential splice site variants, 9 missense variants, 1 in-frame insertion-deletion, and 1 microdeletion (1.16 Mb). Consequently, our data indicate that loss of *ANKRD17* is likely the main cause of phenotypes previously associated with large multi-gene chromosomal aberrations of the 4q13.3 region. Protein modeling suggests that most of the missense variants disrupt the stability of the ankyrin repeats through alteration of core structural residues. The major phenotypic characteristic of our cohort is a variable degree of developmental delay/intellectual disability, particularly affecting speech, while additional features include growth failure, feeding difficulties, non-specific MRI abnormalities, epilepsy and/or abnormal EEG, predisposition to recurrent infections (mostly bacterial), ophthalmological abnormalities, gait/balance disturbance, and joint hypermobility. Moreover, many individuals shared similar dysmorphic facial features. Analysis of single-cell RNA-seq data from the developing human telencephalon indicated *ANKRD17* expression at multiple stages of neurogenesis, adding further evidence to the assertion that damaging *ANKRD17* variants cause a neurodevelopmental disorder.

Ankyrin repeat domain 17 (*ANKRD17*) belongs to a protein family characterized by the presence of ankyrin repeats, one of the most widespread structural motifs in eukaryotes. Each Ankyrin repeat consists of approximately 33 amino acids, with multiple repeats organized into linear arrays that typically serve as protein-protein interaction surfaces. The motif is found in many proteins with a wide variety of functions including transcriptional regulation, cytoskeletal organization, and signal transduction.<sup>1</sup> *ANKRD17* (MIM: 615929) is widely expressed<sup>2,3</sup> and

encodes for a protein containing two distinct clusters of ankyrin repeats within its amino-terminal half, and a KH domain in its carboxy-terminal half (Figure 1). Homozygous *Ankrd17* deficiency in mice results in abnormal vascular maturation, hemorrhage, and lethality by embryonic day (E) 11.5,<sup>3</sup> so the role of this gene at subsequent developmental stages has not been studied. The *Drosophila* ortholog of *ANKRD17*, *Mask*, is required for tissue growth, acting as a co-factor to the Yorkie transcriptional coactivator, an effector of the Hippo pathway.<sup>4,5</sup> *In vitro* studies

<sup>1</sup>Département de Génétique, Hôpital Necker-Enfants Malades, Assistance Publique Hôpitaux de Paris (AP-HP), and Institut *Imagine*, Paris 75015, France; <sup>2</sup>Laboratory of embryology and genetics of human malformations, Institut National de la Santé et de la Recherche Médicale (INSERM) UMR 1163, Institut *Imagine*, Université de Paris, Paris 75015, France; <sup>3</sup>Rosamund Stone Zander Translational Neuroscience Center, Department of Neurology, Boston Children's Hospital, Boston, MA 02115, USA; <sup>4</sup>Department of Medical Genetics, St George's University Hospitals NHS FT, London SW17 0RE, UK; <sup>5</sup>Manchester Centre for Genomic Medicine, University of Manchester, St Mary's Hospital, Manchester M13 9WL, UK; <sup>6</sup>Division of Evolution and Genomic Sciences, School of Biological Sciences, University of Manchester, Manchester M13 9WL, UK; <sup>7</sup>Institute of Human Genetics, University of Leipzig Medical Center, Leipzig 04129, Germany; <sup>8</sup>Department of Medical Genetics, Kasturba Medical College, Manipal Academy of Higher Education, Manipal 576104, India; <sup>9</sup>Genetics Metabolic Unit, Department of Pediatrics, PGIMER, Chandigarh 160012, India; <sup>10</sup>Department of Human Genetics, Radboud University Medical Centre, 6500 HB Nijmegen, the Netherlands; <sup>11</sup>Department of Genetics University of Groningen, University Medical Centre Groningen, Groningen CB50, the Netherlands; <sup>12</sup>Department of Clinical Genetics, Erasmus Medical Center, University Medical Center Rotterdam, Dr Molewaterplein 40, 3015 GD Rotterdam, the Netherlands; <sup>13</sup>Department of Translational Medicine, Section of Pediatrics, Federico II University of Naples, Naples 80131, Italy; <sup>14</sup>Telethon Institute of Genetics and Medicine, Pozzuoli, Naples 80078, Italy; <sup>15</sup>Institute of Human Genetics and Department of Pediatrics, University Medical Center Hamburg-Eppendorf, Hamburg 20246, Germany; <sup>16</sup>Department of Medical Genetics, University of British Columbia, Vancouver, BC V6H 3N1, Canada; <sup>17</sup>HudsonAlpha Institute for Biotechnology, Huntsville, AL 35806, USA; <sup>18</sup>University of Alabama at Birmingham, Department of Neurology and Pediatrics, Birmingham, AL 35294, USA; <sup>19</sup>Department of Clinical Genetics, Leiden University Medical Centre, 2300 RC Leiden, the Netherlands; <sup>20</sup>Department of Neurology, Leiden University Medical Centre, 2300 RC Leiden, the Netherlands; <sup>21</sup>Division of Genetics, Department of Pediatrics, UCSF, San Francisco, CA 94158, USA; <sup>22</sup>Department of Neurology, University of California, San Francisco, San Francisco, CA 94110, USA; <sup>23</sup>Institute for Human Genetics,

(Affiliations continued on next page)

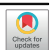

Emilia K. Bijlsma,<sup>19</sup> Mariette J.V. Hoffer,<sup>19</sup> Cacha Peeters-Scholte,<sup>20</sup> Anne Slavotinek,<sup>21</sup> William A. Weiss,<sup>22</sup> Tiffany Yip,<sup>23</sup> Ugur Hodoglugil,<sup>23</sup> Amy Whittle,<sup>24</sup> Janette diMonda,<sup>25</sup> Juanita Neira,<sup>25</sup> Sandra Yang,<sup>26</sup> Amelia Kirby,<sup>27</sup> Hailey Pinz,<sup>28</sup> Rosan Lechner,<sup>12</sup> Frank Sleutels,<sup>12</sup> Ingo Helbig,<sup>29,30,31,32</sup> Sarah McKeown,<sup>29,30</sup> Katherine Helbig,<sup>29,30</sup> Rebecca Willaert,<sup>26</sup> Jane Juusola,<sup>26</sup> Jennifer Semotok,<sup>26</sup> Medard Hadonou,<sup>33</sup> John Short,<sup>33</sup> Genomics England Research Consortium,<sup>34,35</sup> Naomi Yachelevich,<sup>36</sup> Sajel Lala,<sup>37</sup> Alberto Fernández-Jaen,<sup>38</sup> Janvier Porta Pelayo,<sup>39</sup> Chiara Klöckner,<sup>7</sup> Susanne B. Kamphausen,<sup>40</sup> Rami Abou Jamra,<sup>7</sup> Maria Arelin,<sup>41</sup> A. Micheil Innes,<sup>42</sup> Anni Niskakoski,<sup>43</sup> Sam Amin,<sup>44</sup> Maggie Williams,<sup>45</sup> Julie Evans,<sup>45</sup> Sarah Smithson,<sup>44</sup> Damian Smedley,<sup>46</sup> Anna de Burca,<sup>47</sup> Usha Kini,<sup>47</sup> Martin B. Delatycki,<sup>48,49</sup> Lyndon Gallacher,<sup>48,49</sup> Alison Yeung,<sup>48,49</sup> Lynn Pais,<sup>50</sup> Michael Field,<sup>51</sup> Ellenore Martin,<sup>51</sup> Perrine Charles,<sup>52</sup> Thomas Courtin,<sup>53</sup> Boris Keren,<sup>53</sup> Maria Iascone,<sup>54</sup> Anna Cereda,<sup>55</sup> Gemma Poke,<sup>56</sup> Véronique Abadie,<sup>57</sup> Christel Chalouhi,<sup>57</sup> Padmini Parthasarathy,<sup>58</sup> Benjamin J. Halliday,<sup>58</sup> Stephen P. Robertson,<sup>58</sup> Stanislas Lyonnet,<sup>1,2</sup> Jeanne Amiel,<sup>1,2,59</sup> and Christopher T. Gordon<sup>2,59,\*</sup>

suggest that ANKRD17 also interacts with cyclin E/CDK2 and stimulates cell cycle progression, with overexpression promoting S phase entry and depletion resulting in inhibition of DNA replication.<sup>2</sup> In addition, a role for ANKRD17 in both anti-bacterial immunity, via the NOD1- and NOD2-mediated immune responses,<sup>6</sup> and anti-viral immunity, via the RIG-1-like receptor-mediated signaling pathway,<sup>7</sup> has been proposed. ANKRD17 is highly intolerant to loss of function in the human population, with a gnomAD pLI score (probability that the gene is intolerant to loss of function) of 1.0 and an observed/expected LoF score of 0.02 (90% CI 0.01–0.06). There is also an increased constraint against missense variation, with a positive z score (for deviation of observed from expected number of variants) of 5.36 in gnomAD (with a higher z score reflecting intolerance to missense variation).<sup>8</sup> These gene-wide constraint metrics do not necessarily capture the variability in regional constraint since some regions within a gene are more highly conserved than others. However, ANKRD17 is one of a small subset of genes having multiple

constrained coding regions in the 99<sup>th</sup> percentile or higher (measured as length of coding sequence without gnomAD variation).<sup>9</sup>

Here, we report 34 individuals with heterozygous pathogenic variants or a microdeletion of ANKRD17 (GenBank: NM\_032217.4) and presenting with neurodevelopmental features, ascertained through an international collaborative effort utilizing GeneMatcher<sup>11</sup> and DECIPHER.<sup>12</sup> In total there were 19 females and 15 males, with an age range of 4 months to 34 years. Apart from one familial case (an affected mother and son) and a set of monozygotic female twins, all affected individuals were simplex cases. After obtaining written informed consent for either diagnostic or institutional review board-approved research sequencing, all individuals were enrolled for whole-exome or whole-genome sequencing (with the exception of individual 6, whose microdeletion was identified on array-CGH) according to standard protocols, details of which can be found in the [supplemental information](#). Consent for publication of images was obtained from parents or legal guardians.

University of California, San Francisco, San Francisco, CA 94143, USA; <sup>24</sup>Department of Pediatrics, Zuckerberg San Francisco General, San Francisco, UCSF, San Francisco, CA 94143, USA; <sup>25</sup>Department of Human Genetic, Emory University, Atlanta, GA 30322, USA; <sup>26</sup>Clinical Genomics Program, GeneDx, 207 Perry Parkway, Gaithersburg, MD 20877, USA; <sup>27</sup>Section on Medical Genetics, Wake Forest School of Medicine, Winston-Salem, NC 27157, USA; <sup>28</sup>Division of Medical Genetics, Saint Louis University School of Medicine, St. Louis, MO 63104, USA; <sup>29</sup>Division of Neurology, Children's Hospital of Philadelphia, Philadelphia, PA 19104, USA; <sup>30</sup>The Epilepsy NeuroGenetics Initiative (ENGIN), Children's Hospital of Philadelphia, Philadelphia, PA 19014, USA; <sup>31</sup>Department of Biomedical and Health Informatics (DBHi), Children's Hospital of Philadelphia, Philadelphia, PA 19104, USA; <sup>32</sup>Department of Neurology, University of Pennsylvania, Perelman School of Medicine, Philadelphia, PA 19104, USA; <sup>33</sup>St. George's Genomics Service, St George's University Hospitals NHS FT, London SW17 0RE, UK; <sup>34</sup>Genomics England, London EC1M 6BQ, UK; <sup>35</sup>William Harvey Research Institute, Queen Mary University of London, London EC1M 6BQ, UK; <sup>36</sup>NYU Clinical Genetics Services, 145 E 32<sup>nd</sup> St PH, New York, NY 10016, USA; <sup>37</sup>Division of Clinical Genetics, Nicklaus Children's Health System, 3100 SW 62<sup>nd</sup> Avenue, Coral Gables, FL 33155, USA; <sup>38</sup>Department of Pediatric Neurology, Hospital Universitario Quirónsalud, Madrid and Universidad Complutense, Madrid 28224, Spain; <sup>39</sup>Genologica Center, Málaga 29016, Spain; <sup>40</sup>Institute of Human Genetics, University Hospital Magdeburg, Magdeburg 39120, Germany; <sup>41</sup>Department for Women and Child Health, Hospital for Children and Adolescents, University Hospitals, University of Leipzig, Leipzig 04129, Germany; <sup>42</sup>Department of Medical Genetics and Albert Children's Hospital Research Institute, Cumming School of Medicine, Calgary, AB T3B 6A8, Canada; <sup>43</sup>Blueprint Genetics, Keilaranta 16 A-B, 02150 Espoo, Finland; <sup>44</sup>WE Genomic Medicine Centre, University Hospitals Bristol NHS Foundation Trust, Bristol B52 8EG, UK; <sup>45</sup>Bristol Genetics Laboratory, North Bristol NHS Trust, Pathology Sciences Building, Southmead Hospital, Bristol BS10 5NB, UK; <sup>46</sup>William Harvey Research Institute, Barts and the London School of Medicine and Dentistry, Queen Mary University of London, London EC1M 6BQ, UK; <sup>47</sup>Oxford Centre for Genomic Medicine, Oxford and Spire Cleft Centre, Oxford OX3 9DU, UK; <sup>48</sup>Victorian Clinical Genetics Services, Murdoch Children's Research Institute, Parkville, VIC 3052, Australia; <sup>49</sup>Department of Paediatrics, The University of Melbourne, Parkville, VIC 3052, Australia; <sup>50</sup>Broad Institute - Center for Mendelian Genomics, Broad Institute of Harvard and MIT, Cambridge, MA 02142, USA; <sup>51</sup>NSW Genetics of Learning Disability Service, Waratah, NSW 2298, Australia; <sup>52</sup>Département de Génétique, Centre de Référence Déficiences Intellectuelles de Causes Rares, Groupe Hospitalier Pitié Salpêtrière, AP-HP, Sorbonne Université, Paris 75013, France; <sup>53</sup>Département de génétique, Hôpital Pitié-Salpêtrière, AP-HP, Sorbonne Université, Paris 75013, France; <sup>54</sup>Medical Genetics Laboratory, ASST Papa Giovanni XXIII, Bergamo 24127, Italy; <sup>55</sup>Pediatric Department, ASST Papa Giovanni XXIII, Bergamo 24127, Italy; <sup>56</sup>Genetic Health Service, New Zealand, Central Hub Wellington Hospital, Wellington 6242, New Zealand; <sup>57</sup>Department of Paediatrics, Necker-Enfants Malades University Hospital, AP-HP, Centre de référence du syndrome de Pierre Robin et troubles de succion-déglutition congénitaux (SPRATON), Paris 75015, France; <sup>58</sup>Department of Women's and Children's Health, Dunedin School of Medicine, University of Otago, Dunedin 9016, New Zealand

<sup>59</sup>These authors contributed equally

\*Correspondence: [maya.chopra@childrens.harvard.edu](mailto:maya.chopra@childrens.harvard.edu) (M.C.), [chris.gordon@inserm.fr](mailto:chris.gordon@inserm.fr) (C.T.G.)  
<https://doi.org/10.1016/j.ajhg.2021.04.007>

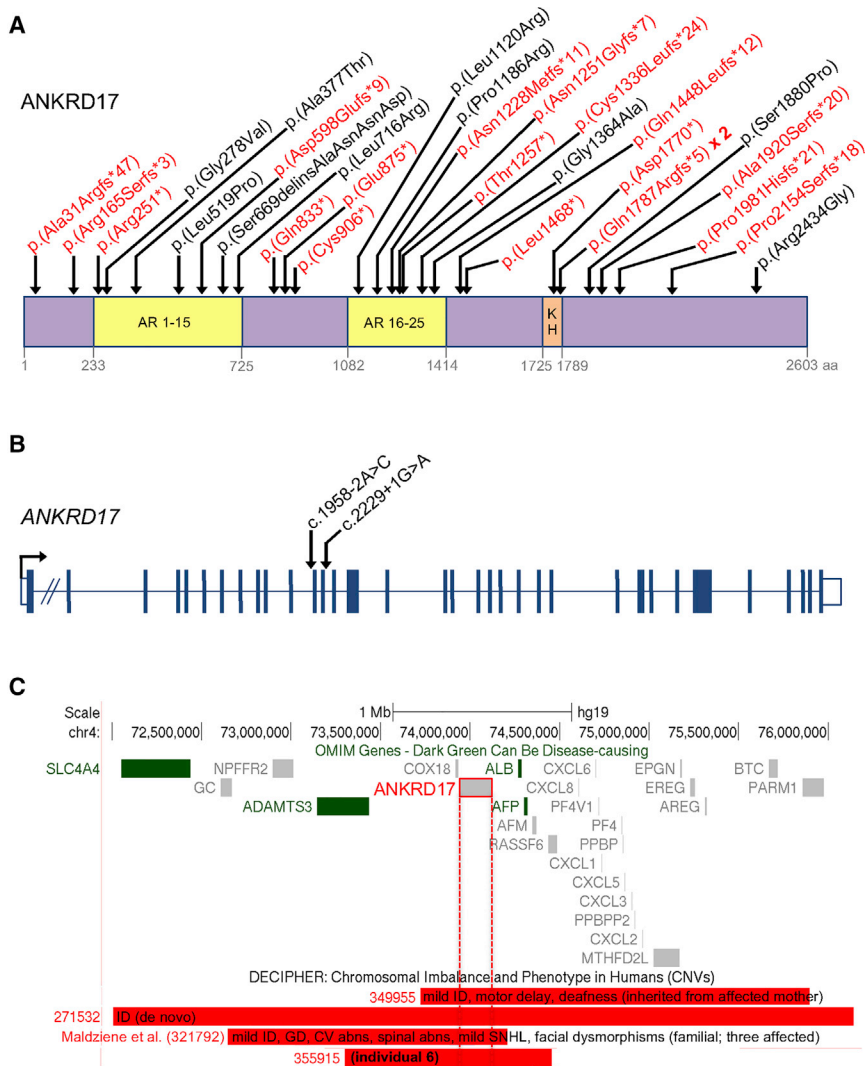

**Figure 1. Distribution of pathogenic ANKRD17 variants and 4q13.3 deletions**

(A) Variants affecting coding sequence. Truncating variants are in red. Domain boundaries are based on Uniprot entry O75179. AR, ankyrin repeats; KH, K Homology domain.

(B) Variants affecting essential splice sites. Exon-intron structure drawn approximately to scale (apart from intron 1), according to GenBank: NM\_032217.4.

(C) Deletions of the region containing ANKRD17 on chromosome 4q13.3. Among the disease-associated OMIM genes in the interval (those in green), the mode of inheritance or associated phenotype is not compatible with that of the deletions shown. Only deletions under 5 Mb from the DECIPHER database are shown. For DECIPHER individuals 349955 and 271532, publicly available clinical information is listed; individual 321792 is one of three affected individuals of the previously described familial case<sup>10</sup> (the phenotypes listed on the figure are a summary of all three family members); and individual 355915 corresponds to individual 6 in the present report (see Table S1 for details). ID, intellectual disability; GD, growth delay; CV, cardiovascular; abns, abnormalities; SNHL, sensorineural hearing loss.

ported once in gnomAD v.2.1.1, although only as a filtered variant, i.e. it did not meet gnomAD's quality control requirements, and c.2497C>T (p.Gln833\*) (individual 22), also reported once. The distribution of truncating ANKRD17 variants appeared random along the protein, although

The mutational spectrum of our cohort is shown in Table 1 and Figure 1. Of the variants identified in the 32 probands, there were a total of 22 likely to result in loss of function, comprising 7 nonsense variants, 12 small deletions or duplications resulting in frameshifts, 2 essential splice site variants, and 1 large multi-gene deletion. The latter was a *de novo* 1.16 Mb microdeletion, identified by array-CGH, encompassing ANKRD17 and six other protein-coding genes in individual 6, who presented with intellectual disability (ID), absent speech, and dysmorphism (Figure 1C). The six other genes in the deletion comprised three for which biallelic loss of function is implicated in unrelated autosomal-recessive disease (ADAMTS3 [MIM: 605011], ALB [MIM: 103600], and AFP [MIM: 104150]) and three not known to be disease associated, each with a pLI of 0 (COX18 [MIM: 610428], AFM [MIM: 104150], and RASSF6 [MIM: 612620]). ANKRD17 was therefore determined to be the most likely candidate gene within the deleted region. None of the variants identified in our cohort have previously been described in gnomAD,<sup>8</sup> with the exception of two cases: c.90dup (p.Ala31Argfs\*47) (individual 18), re-

one *de novo* frameshift, c.5360–5363del (p.Gln1787Argfs\*5), was recurrent in two unrelated individuals. There were nine probands with *de novo* ANKRD17 missense variants, and one with an in-frame deletion-insertion, all of which affect highly conserved amino acids (see below).

The ANKRD17 variants were shown to be *de novo* in 29 of the 34 individuals. On trio WGS, the truncating variant in individual 11 was found to be inherited from a parent (individual 12) with intellectual abilities in the borderline range (FSIQ 74). This individual had been schooled in the special education system and had a history of depression and anxiety. There was no suspicion of mosaicism in individual 12 (reference / alternate read ratio of 27/39). We were unable to determine whether her variant was *de novo*, due to lack of availability of parental DNA. The nonsense variant identified in individual 16 was present in paternal blood DNA at a frequency of five reads out of a total read count of 135 (3.7%), suggestive of low-level somatic mosaicism. This father was healthy, non-dysmorphic, and of normal intelligence. In individual 20, the variant was absent in maternal DNA but paternal DNA was

**Table 1. ANKRD17 variants**

| Individual No.  | Technique | Chr4(GRCh37) <sup>a</sup>            | NM_032217.4 (ANKRD17)        | Amino acid                 | Exon      | Inheritance                          | Predicted effect | gnomAD <sup>b</sup> allele count (frequency) | SIFT        | Poly-Phen-2       | CADD score <sup>c</sup> | Sanger confirmation |
|-----------------|-----------|--------------------------------------|------------------------------|----------------------------|-----------|--------------------------------------|------------------|----------------------------------------------|-------------|-------------------|-------------------------|---------------------|
| 1               | trio WES  | g.74008486T>G                        | c.1958-2A>C                  | N/A                        | intron 11 | <i>de novo</i>                       | splicing         | 0                                            | N/A         | N/A               | N/A                     | +                   |
| 2               | trio WES  | g.73984502C>G                        | c.4091G>C                    | p.Gly1364Ala               | 22        | <i>de novo</i>                       | missense         | 0                                            | tolerated   | probably damaging | 27.7                    | +                   |
| 3               | trio WES  | g.73979568_73979571del               | c.4341_4344del               | p.Gln1448Leufs*12          | 24        | <i>de novo</i>                       | frameshift       | 0                                            | N/A         | N/A               | N/A                     | Q                   |
| 4               | trio WES  | g.73990763A>C                        | c.3359T>G                    | p.Leu1120Arg               | 18        | <i>de novo</i>                       | missense         | 0                                            | deleterious | benign            | 25.4                    | Q                   |
| 5               | trio WES  | g.74014541A>G                        | c.1556T>C                    | p.Leu519Pro                | 8         | <i>de novo</i>                       | missense         | 0                                            | deleterious | probably damaging | 26.2                    | Q                   |
| 6               | array-CGH | 4q13.3 (73303180-74459331)           | N/A                          | N/A                        | N/A       | <i>de novo</i>                       | large deletion   | –                                            | N/A         | N/A               | N/A                     | N/A                 |
| 7               | trio WES  | g.74005615G>T                        | c.2718C>A                    | p.Cys906*                  | 15        | <i>de novo</i>                       | nonsense         | 0                                            | N/A         | N/A               | N/A                     | +                   |
| 8               | trio WES  | g.73957982_73957985del               | c.5360_5363del               | p.Gln1787Argfs*5           | 29        | <i>de novo</i>                       | frameshift       | 0                                            | N/A         | N/A               | N/A                     | +                   |
| 9               | trio WES  | g.73959817_73959823del               | c.5304_5310del               | p.Asp1770*                 | 28        | <i>de novo</i>                       | nonsense         | 0                                            | N/A         | N/A               | N/A                     | Q                   |
| 10              | trio WES  | g.73957707A>G                        | c.5638T>C                    | p.Ser1880Pro               | 29        | <i>de novo</i>                       | missense         | 0                                            | tolerated   | probably damaging | 26.3                    | Q                   |
| 11 <sup>d</sup> | trio WGS  | g.74005710C>A                        | c.2623G>T                    | p.Glu875*                  | 15        | inherited                            | nonsense         | 0                                            | N/A         | N/A               | N/A                     | +                   |
| 12 <sup>d</sup> | WGS       | g.74005710C>A                        | c.2623G>T                    | p.Glu875*                  | 15        | ND                                   | nonsense         | 0                                            | N/A         | N/A               | N/A                     | +                   |
| 13              | trio WES  | g.74007958C>T                        | c.2229+1G>A                  | N/A                        | intron 13 | <i>de novo</i>                       | splicing         | 0                                            | N/A         | N/A               | N/A                     | Q                   |
| 14              | trio WES  | g.73957590dup                        | c.5756dup                    | p.Ala1920Serfs*20          | 29        | <i>de novo</i>                       | frameshift       | 0                                            | N/A         | N/A               | N/A                     | +                   |
| 15              | trio WES  | g.73956886_73956887del               | c.6460_6461del               | p.Pro2154Serfs*18          | 29        | <i>de novo</i>                       | frameshift       | 0                                            | N/A         | N/A               | N/A                     | +                   |
| 16              | trio WES  | g.74021837G>A                        | c.751C>T                     | p.Arg251*                  | 4         | suspected paternal mosaicism         | nonsense         | 0                                            | N/A         | N/A               | N/A                     | +                   |
| 17              | trio WGS  | g.73968263A>C                        | c.4403T>G                    | p.Leu1468*                 | 25        | <i>de novo</i>                       | nonsense         | 0                                            | N/A         | N/A               | N/A                     | +                   |
| 18              | trio WES  | g.74124302dup                        | c.90dup                      | p.Ala31Argfs*47            | 1         | <i>de novo</i>                       | frameshift       | 1 (0.000018) <sup>e</sup>                    | N/A         | N/A               | N/A                     | Q                   |
| 19              | trio WES  | g.74008436_74008437delinsTCATTATTAGC | c.2005_2006delinsGCTAATAATGA | p.Ser669delinsAlaAsnAsnAsp | 12        | <i>de novo</i>                       | in-frame indel   | 0                                            | N/A         | N/A               | N/A                     | +                   |
| 20              | duo WES   | g.74043148_74043149delinsG           | c.495_496delinsC             | p.Arg165Serfs*3            | 2         | absent in mother, father unavailable | frameshift       | 0                                            | N/A         | N/A               | N/A                     | +                   |

(Continued on next page)

**Table 1. Continued**

| Individual No.  | Technique | Chr4(GRCh37) <sup>a</sup>      | NM_032217.4 (ANKRD17)  | Amino acid        | Exon | Inheritance    | Predicted effect | gnomAD <sup>b</sup> allele count (frequency) | SIFT        | Poly-Phen-2       | CADD score <sup>c</sup> | Sanger confirmation |
|-----------------|-----------|--------------------------------|------------------------|-------------------|------|----------------|------------------|----------------------------------------------|-------------|-------------------|-------------------------|---------------------|
| 21              | WES       | g.73985897del                  | c.4007del              | p.Cys1336Leufs*24 | 21   | ND             | frameshift       | 0                                            | N/A         | N/A               | N/A                     | +                   |
| 22              | trio WES  | g.74005836G>A                  | c.2497C>T              | p.Gln833*         | 15   | <i>de novo</i> | nonsense         | 1 (0.0000040)                                | N/A         | N/A               | N/A                     | +                   |
| 23              | trio WES  | g.73986689_73986696 delinsGTCC | c.3751_3758delins GGAC | p.Asn1251Glyfs*7  | 20   | <i>de novo</i> | frameshift       | 0                                            | N/A         | N/A               | N/A                     | Q                   |
| 24              | trio WES  | g.73957982_73957985del         | c.5360_5363del         | p.Gln1787Argfs*5  | 29   | <i>de novo</i> | frameshift       | 0                                            | N/A         | N/A               | N/A                     | Q                   |
| 25              | trio WES  | g.73957398_73957404del         | c.5942_5948del         | p.Pro1981Hisfs*21 | 29   | <i>de novo</i> | frameshift       | 0                                            | N/A         | N/A               | N/A                     | Q                   |
| 26              | trio WGS  | g.74021755C>A                  | c.833G>T               | p.Gly278Val       | 4    | <i>de novo</i> | missense         | 0                                            | deleterious | probably damaging | 31                      | Q                   |
| 27              | trio WGS  | g.73944467G>C                  | c.7300C>G              | p.Arg2434Gly      | 31   | <i>de novo</i> | missense         | 0                                            | deleterious | probably damaging | 26                      | Q                   |
| 28              | trio WGS  | g.74012557dup                  | c.1793dup              | p.Asp598Glyfs*9   | 10   | <i>de novo</i> | frameshift       | 0                                            | N/A         | N/A               | N/A                     | Q                   |
| 29              | trio WES  | g.73987412G>C                  | c.3557C>G              | p.Pro1186Arg      | 19   | <i>de novo</i> | missense         | 0                                            | deleterious | probably damaging | 27.6                    | Q                   |
| 30 <sup>f</sup> | trio WES  | g.74019702C>T                  | c.1129G>A              | p.Ala377Thr       | 6    | <i>de novo</i> | missense         | 0                                            | tolerated   | probably damaging | 26.8                    | Q                   |
| 31 <sup>f</sup> | trio WES  | g.74019702C>T                  | c.1129G>A              | p.Ala377Thr       | 6    | <i>de novo</i> | missense         | 0                                            | tolerated   | probably damaging | 26.8                    | Q                   |
| 32              | trio WES  | g.74008041A>C                  | c.2147T>G              | p.Leu716Arg       | 13   | <i>de novo</i> | missense         | 0                                            | deleterious | probably damaging | 28.6                    | Q                   |
| 33              | trio WES  | g.73986678_73986681del         | c.3769_3772del         | p.Thr1257*        | 20   | <i>de novo</i> | nonsense         | 0                                            | N/A         | N/A               | N/A                     | +                   |
| 34              | trio WES  | g.73986765del                  | c.3683del              | p.Asn1228Metfs*11 | 20   | <i>de novo</i> | frameshift       | 0                                            | N/A         | N/A               | N/A                     | +                   |

N/A, not applicable; Q quality criteria met, see [Table S2](#) for details.

<sup>a</sup>Mutation nomenclature was verified using Mutalyzer.

<sup>b</sup>Refers to total allele counts and total frequencies in gnomAD dataset v2.1.1.

<sup>c</sup>CADDv1.4 scores range from 1 to 99, with a higher score indicating greater deleteriousness.

<sup>d</sup>Individual 11 is the offspring of individual 12.

<sup>e</sup>Quality criteria not met for variant to be included in gnomAD (failed random forest filters).

<sup>f</sup>Individuals 30 and 31 are monozygotic twins.

**Table 2. Frequencies of phenotypic characteristics of individuals with ANKRD17 variants**

|                                | Frequency               |
|--------------------------------|-------------------------|
| Sex                            | F = 19, M = 15          |
| <b>Growth</b>                  |                         |
| Height < -2 SD                 | 12/31                   |
| Weight < -2 SD                 | 9/30                    |
| OFC < -2 SD                    | 7/31                    |
| OFC > 2 SD                     | 4/31                    |
| <b>Development</b>             |                         |
| DD or ID                       | 31/34                   |
| severe                         | 7                       |
| moderate                       | 12                      |
| mild                           | 5                       |
| borderline                     | 7                       |
| Motor delay                    | 20/29                   |
| Speech delay <sup>a</sup>      | 29/32                   |
| Other                          | ASD, n = 8; ADHD, n = 4 |
| <b>Neurology</b>               |                         |
| Epilepsy                       | 9/33                    |
| Abnormal EEG                   | 10/23                   |
| Brain MRI abnormalities        | 11/23                   |
| Gait or balance abnormalities  | 9/25                    |
| Spasticity or hypertonia       | 4/26                    |
| <b>Other</b>                   |                         |
| Recurrent infections           | 11/33                   |
| Feeding problems               | 11/27                   |
| Palate abnormalities           | 3/34                    |
| Hypermobility                  | 9/29                    |
| Ophthalmological abnormalities | 13/23                   |
| <b>Miscellaneous</b>           |                         |
| Minor digital anomalies        | 6                       |
| Genitourinary abnormalities    | 5                       |
| Pigmentary abnormalities       | 4                       |
| Scoliosis                      | 3                       |
| Abnormal bone mineralization   | 2                       |
| Prominent blood vessels        | 2                       |

ADHD, attention deficit hyperactivity disorder; ASD, autism spectrum disorder  
<sup>a</sup>For details see [Table S1](#)

unavailable for testing. Inheritance status could not be determined in individual 21 due to lack of parental DNA.

The frequencies of phenotypic characteristics are found in [Table 2](#). The counts on which these frequencies were calculated are found in [Table S1](#). More detailed phenotypic descriptions can be found in [Table S2](#). Global develop-

mental delay (DD)/ID was the most common feature, affecting 31 individuals. The severity of DD/ID was variable, with 19 individuals in the moderate to severe range and 12 in the mild or borderline range. The individuals with typical intellectual functioning were individual 22, an 11-year-old male with autism spectrum disorder (ASD) and behavioral difficulties, and individual 31, a 25-year-old female with renal agenesis, scoliosis, and a history of delayed speech but who is now independent and in the workforce. Individual 34 is only 4 months old and had severe feeding difficulties but reportedly normal development. Her age precludes assessment of her developmental and cognitive status. Speech development was reported as delayed in 29 individuals, including 6 with absent speech (no meaningful words) and 4 who used fewer than 10 words meaningfully (all over the age of 4 years). Absence of speech was observed in individuals with varying degrees of DD/ID, including one individual in the borderline and one in the mild range of ID. Detailed neuropsychiatric evaluation was available in five individuals (see [Table S2](#)) and confirmed a discrepancy between verbal IQ and performance IQ (verbal IQ < performance IQ) in three of these individuals. Less commonly reported neurodevelopmental phenotypes include ASD (n = 8) and ADHD (n = 4).

Neonatal growth parameters were normal in the majority of individuals ([Table S2](#)) but postnatal growth failure was a feature of almost half of the individuals (height < -2 SD in n = 12 and weight < -2 SD in n = 9). One individual with marked growth failure (individual 3, height -3.8 SD) was under treatment with growth hormone (GH), although GH stimulation testing was normal. Feeding difficulties, especially reduced oral intake, were reported at some stage in 11 individuals, 5 of whom required G-tube nutritional supplementation. Postnatal microcephaly (OFC < -2SD) was noted in seven individuals, and macrocephaly in four (one of these individuals, however, also harbored a pathogenic *de novo* NSD1 variant (GenBank: NM\_022455.4, c.2615T>G [p.Leu872\*]). Epilepsy was reported in nine individuals (individuals 1, 2, 16, 19, 21, 25, 27, 28, and 33), with an age of onset of under 2 years for five individuals (individuals 1, 2, 16, 19, and 25). Focal seizures with secondary generalization was the most common seizure subtype, present in five individuals (individuals 1, 2, 21, 25, and 27). One individual had Lennox-Gastaut epilepsy (individual 16), one had tonic seizures with head deviation (individual 19), one had mixed myoclonic and tonic-clonic epilepsy (individual 33), and another a mixture of tonic-clonic and absence seizures (individual 28). Seizures were well controlled (less frequent than every 2 years) in five individuals (individuals 2, 21, 25, 28, and 33), all of whom were on three or fewer anti-epileptic drugs (AEDs). Moderate control, with seizures every 2–3 months, was reported in individual 1, who was on Valproate monotherapy. Two individuals had refractory epilepsy during at least parts of their disease course—individual 19 who had frequent tonic seizures in infancy that resolved with topiramate monotherapy and individual 16

who had multiple seizures every day despite three AEDs. Further details of epilepsy phenotype, including previously trialled AEDs, are noted in [Table S2](#). There were four individuals without epilepsy in whom an abnormal EEG was recorded. Other neurological features include poor balance and/or abnormal gait (9/25) and peripheral spasticity (4/26, one of whom one was microcephalic). Neuroimaging abnormalities were identified in 11 of the 23 individuals in whom an MRI was recorded. Abnormalities include decreased white matter volume (individuals 14, 16, and 18), thinning of the corpus callosum (individuals 14 and 19), optic nerve hypoplasia (individuals 18 and 19), a localized hyperintensity (individuals 7 and 31), right temporal sclerosis (individual 16), dilated Virchow-Robin spaces (individual 6), periventricular nodular heterotopia (individual 30), and an arachnoid (individual 24) and pineal cyst (individual 16). Ophthalmological abnormalities were reported in 13/23 individuals.

There were nine individuals with recurrent bacterial infections, one with recurrent viral infections, and one individual with recurrent infections that were both viral and bacterial. The source of bacterial infection was primarily the upper and lower respiratory system and the middle ear (nine individuals) and in some cases required hospitalization. Two individuals were on low-dose prophylactic antibiotics for recurrent otitis media or respiratory tract infections. Notably, individual 26 had a history of pseudomonas and methicillin-resistant staphylococcal aureus (MRSA) infection on his toes. Immunology assessments were recorded in five individuals, details of which can be found in [Table S2](#), with no obvious immunodeficiency identified in these individuals. Generalized joint hypermobility was reported in 9/29 individuals. Notably, there were two individuals with cleft palate in the context of Pierre Robin sequence (PRS) and another with cleft lip and palate. Other infrequent features include minor digital anomalies ( $n = 6$ ), genitourinary abnormalities ( $n = 5$ , of whom three had unilateral renal agenesis), abnormal skin pigmentation ( $n = 4$ ), scoliosis ( $n = 3$ ), abnormality of bone mineralization ( $n = 2$ ), and cutaneous prominence of blood vessels ( $n = 2$ ).

[Figure 2](#) shows the facial features of individuals with the *ANKRD17*-related neurodevelopmental disorder. Key dysmorphic features include a triangular-shaped face found in 10 of the 24 individuals for whom photos were available with a high anterior hairline (19/24), eyes which are either deep-set (5/24) or almond shaped (8/24) with periorbital fullness (6/24), thick nasal alae and flared nostrils (9/24), full cheeks (7/24), and a thin upper lip (12/24). The degree of dysmorphism was variable, with several individuals (particularly individuals 8 and 10) presenting with only subtle dysmorphic characteristics. Persistence of the high anterior hairline, periorbital fullness, and full cheeks into adulthood is demonstrated in individual 12 (age 30 years) and individual 25 (age 34 years).

A number of diagnoses had been considered in several individuals prior to the identification of an *ANKRD17*

variant, including *SATB2*-associated syndrome (MIM: 612313) in individual 5 who presented with PRS, triangular facies and speech delay, and Floating-Harbour syndrome (MIM: 136140) in individual 9 who presented with marked short stature (height  $< -3$  SD), microcephaly (head circumference  $< -2.5$  SD), dysmorphic features, and borderline ID. This highlights the phenotypic overlap of the *ANKRD17*-related disorder with a number of other genetic syndromes, notably those with expressive language delay. In our cohort, significant speech delay was reported in most individuals ( $n = 29$ ) even in those with IQ in the borderline range. The finding that verbal IQ was reduced relative to performance IQ in three of the five individuals for whom deep neuropsychological phenotyping was available adds further evidence to our observation that expressive language is particularly affected in this disorder.

All nine missense variants identified in our cohort occur at amino acids that are very highly conserved across vertebrate *ANKRD17* orthologs ([Figure S1](#)). The human genome has one closely related *ANKRD17* paralog, *ANKHD1* (MIM: 610500), with 60% overall amino acid identity (GenBank: NP\_115593.3 versus NP\_060217.1; Needleman-Wunsch global alignment) and the same protein domain organization, i.e., two ankyrin repeat arrays made up of 15 and 10 repeats, followed by a KH domain. Indeed, the ankyrin repeat arrays have 93%–95% amino acid identity between *ANKRD17* and *ANKHD1*. For the nine *ANKRD17* missense variants, alignment with the corresponding region of *ANKHD1* indicated conservation of the affected amino acid in each case ([Figure S1](#)). Furthermore, alignment of the regions containing the seven *ANKRD17* missense variants that fall in the ankyrin repeats, with the corresponding regions of Mask, the *Drosophila* ortholog of vertebrate *ANKRD17*/*ANKHD1*, also indicated conservation of each ([Figure S1](#)). The presence of two missense variants, c.5638T>C (p.Ser1880Pro) and c.7300C>G (p.Arg2434-Gly), outside of known functional domains, yet falling on residues conserved not only across *ANKRD17* orthologs but also conserved at the equivalent position in *ANKHD1*, highlights the likely functional significance of these previously unexplored regions of each protein ([Figure S1](#)).

Beyond the high level of conservation of affected *ANKRD17* residues across homologous proteins, we also analyzed conservation of these positions across the 25 ankyrin repeats of *ANKRD17* itself. Remarkably, five of the seven ankyrin repeat missense variants affect amino acids that are invariant in all 25 repeats ([Figure 3](#)), with c.833G>T (p.Gly278Val) and c.4091G>C (p.Gly1364Ala) both affecting the 13<sup>th</sup> glycine of their respective repeats and c.1556T>C (p.Leu519Pro) and c.2147T>G (p.Leu716Arg) both affecting the 21<sup>st</sup> leucine in different repeats. The extreme inter- (across *ANKRD17* orthologs and paralogs) and intra- (across *ANKRD17* repeats) homology of amino acids affected by these missense variants in our cohort strongly supports their pathogenicity. The in-frame variant c.2005\_2006delinsGCTAATAATGA (p.Ser669delinsAlaAsnAsnAsp) also occurs at a position

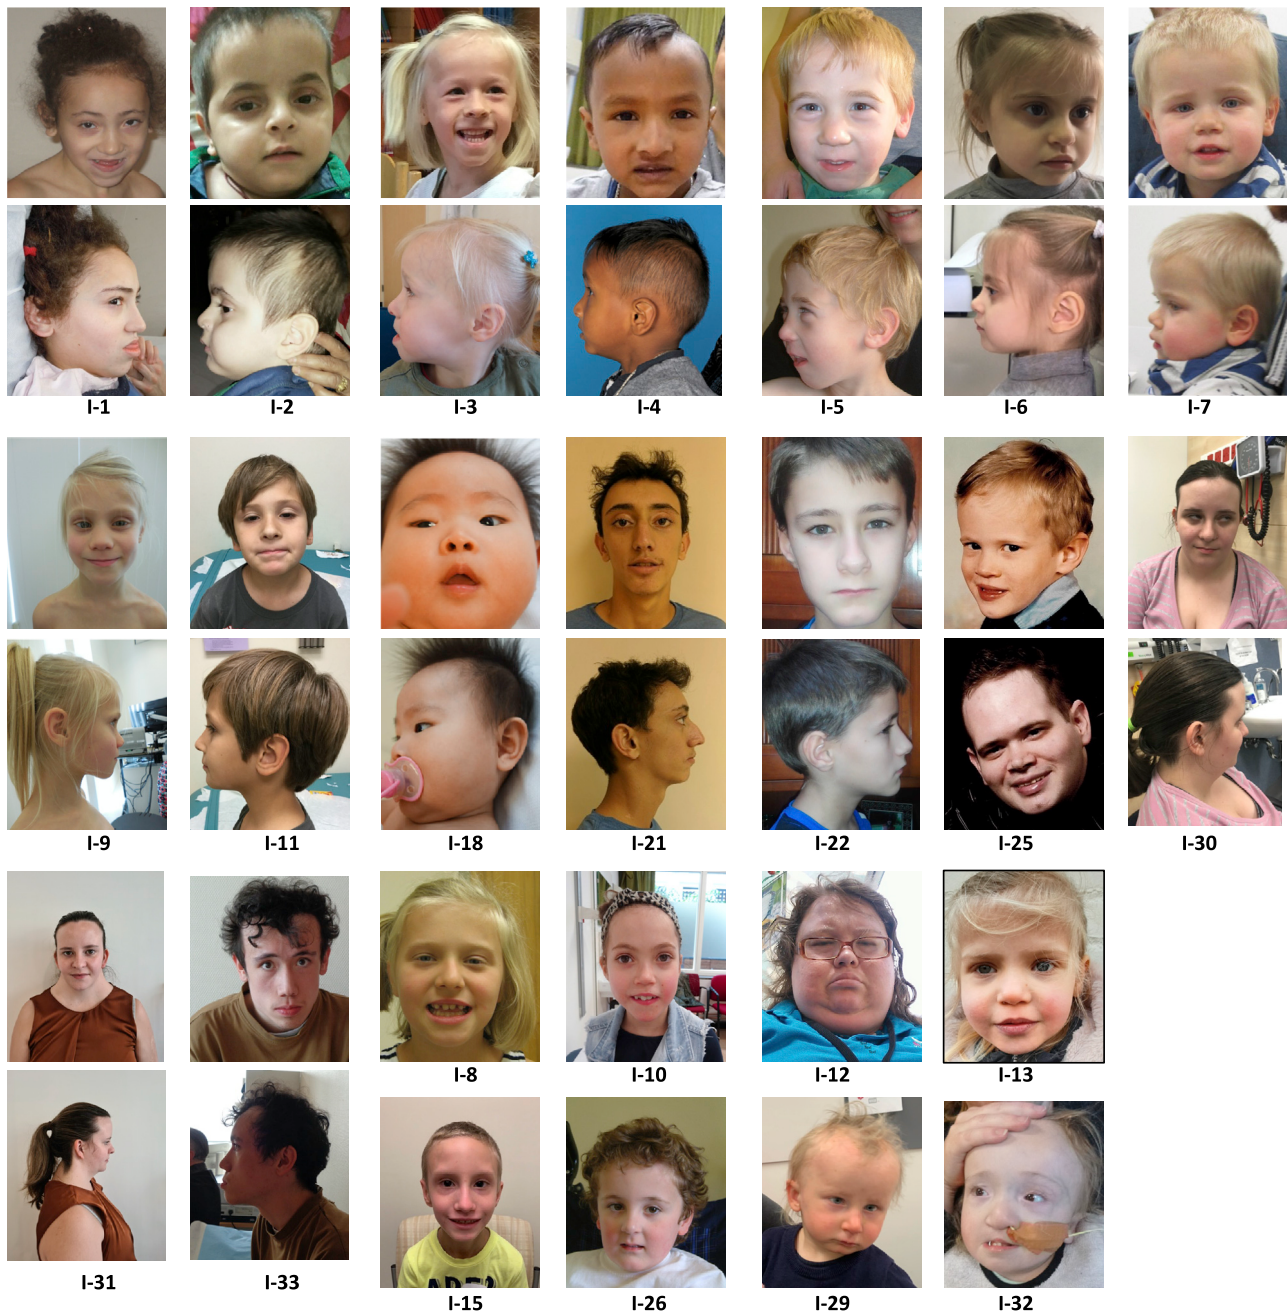

**Figure 2. Dismorphic facial features of the ANKRD17-related disorder**

Physical characteristics include a triangular face (I1, 4, 5, 6, 9, 15, 22, 30, 31, and 33), high anterior hairline (I1-10, 12, 15, 18, 25, 29, 30, 31, 32, and 33), deep set (I2, 3, 6, 7, 30) or almond-shaped (I1, 4, 5, 12, 15, 22, 29, and 33) eyes with periorbital fullness (I1, 3, 4, 5, 8, 12), full cheeks (I2, 6, 7, 12, 18, 26, and 29), thick alae nasi with flared nostrils (I2, 3, 5, 6, 8, 9, 12, 25, 31), and a thin upper lip (I1, 3, 4, 5, 9, 10, 11, 15, 22, 26, 30, and 31).

that is conserved across homologous proteins (Figure S1), but its major effect is likely to involve disruption of the strict spacing of residues necessary for folding of ankyrin repeat 14 (Figure 3). The variant c.3557C>G (p.Pro1186Arg) affects a proline within a motif that is thought to be important for ankyrin repeat stability (the “TPLH tetrapeptide”<sup>13</sup>). Finally, the amino acid affected by the variant c.1129G>A (p.Ala377Thr) displays high inter-species conservation (Figure S1) but low inter-repeat

conservation (Figure 3), suggesting this variant may disrupt a ligand interaction surface rather than the structural core of the ankyrin repeat it falls in.

In order to further assess the effects of the ANKRD17 missense variants at the molecular level, we used homology modeling to generate a three-dimensional structure of the ANKRD17 ankyrin repeats. The model produced for ANKRD17 ankyrin repeats 16–25 conforms to several experimentally determined structures of other ankyrin



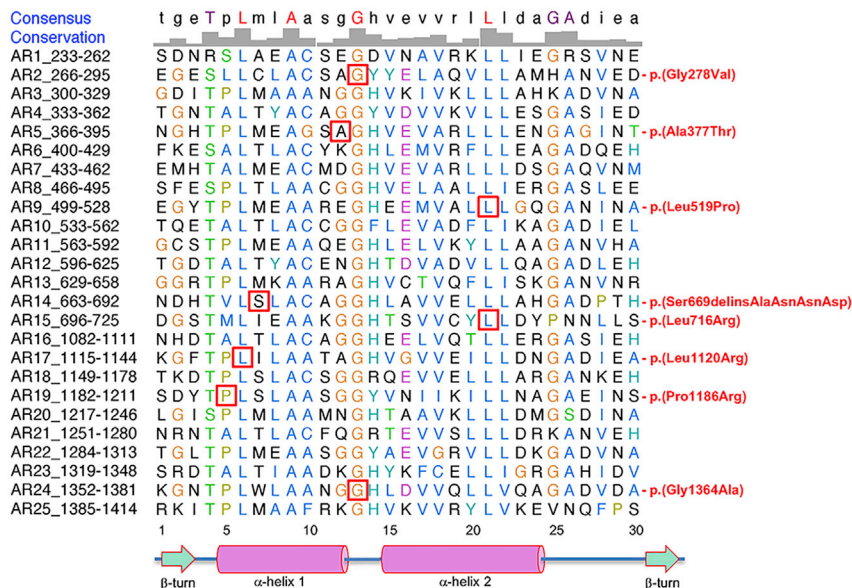

**Figure 3. Conservation of amino acids affected by ANKRD17 non-truncating variants, across ankyrin repeats**

Alignment of the 25 ankyrin repeats of human ANKRD17. The repeats, as defined by UniProtKB, were downloaded and aligned in UCSF Chimera. Amino acids affected by non-truncating variants are boxed in red. In the Consensus row, amino acids in red are 100% identical. Beneath the alignment, the numbering refers to the 30-amino acid repeating sequence of each ankyrin repeat, and the predicted positions of structural motifs that define ankyrin repeats are depicted<sup>14</sup> (note that sequence corresponding to the canonical C-terminal beta-turn was not included in the UniProtKB-defined ANKRD17 ankyrin repeats).

(Figure 1C). Our work now strongly supports the possibility that haploinsufficiency of ANKRD17 is the major cause of these phenotypes in individ-

domain-containing proteins<sup>1,14</sup> with each ankyrin repeat containing two alpha helices connected by a short loop, and arranged in a slightly curved, linear array (Figure 4A). Examination of one representative repeat shows that the invariant glycine altered in individuals 2 and 26 is positioned at the beginning of the sharp turn between helices 1 and 2 (Figure 4B). The constant presence of a glycine at this position may be because of the high flexibility of glycine relative to other amino acids, a property that is likely important for maintenance of the turn. The leucines at the 6<sup>th</sup> and 21<sup>st</sup> positions of the repeat, altered in individuals 4, 5, and 32, participate in formation of the hydrophobic core of each ankyrin repeat (Figure 4B),<sup>14</sup> a property that is perturbed upon mutation to the hydrophilic residue arginine in individuals 4 and 32, while in individual 5 the leucine is changed to the helix-disrupting residue proline. Indeed, leucines at the 6<sup>th</sup> and 21<sup>st</sup> positions and glycine at the 13<sup>th</sup> position are among the most conserved residues of ankyrin repeats across all three domains of life, suggesting their importance for basic structural integrity of the motif.<sup>1,15</sup> The ANKRD17 missense variants affecting these residues are therefore more likely to disrupt the core structure of individual repeats, leading to protein destabilization, rather than disrupting specific ligand-interaction surfaces.

Previously, three individuals with *de novo* ANKRD17 variants (two missense and one in-frame deletion of one amino acid) were listed in large-scale sequencing studies of autism, without further phenotypic information.<sup>16–18</sup> The significance of these ANKRD17 variants was not explored in those reports, but we note that two of them fall outside of the ankyrin repeats, making their interpretation difficult, while one is within ankyrin repeat 25. Large deletions of a region harboring ANKRD17 and several other genes on chromosome 4q13.3 have previously been identified in individuals with ID, growth delay, and dysmorphic facial features<sup>10,19</sup>

and the predicted positions of structural motifs that define ankyrin repeats are depicted<sup>14</sup> (note that sequence corresponding to the canonical C-terminal beta-turn was not included in the UniProtKB-defined ANKRD17 ankyrin repeats).

Our work now strongly supports the possibility that haploinsufficiency of ANKRD17 is the major cause of these phenotypes in individuals with large alterations of 4q13.3. In turn, the phenotypic similarities between individuals with deletions containing ANKRD17, and individuals described here with ANKRD17 point mutations, support haploinsufficiency as the underlying disease basis in the latter. Pathogenic variants in several other genes in the large ANKRD family have been implicated in Mendelian disease. Heterozygous loss-of-function variants in ANKRD11 (MIM: 611192) are causative of a syndromic ID, the variable but recognizable KBG syndrome (MIM: 148050) characterized by neurodevelopmental delay, macrodontia, short stature, and skeletal anomalies.<sup>20</sup> Haploinsufficiency of SHANK3 (MIM: 606230) is responsible for Phelan-McDermid syndrome<sup>21</sup> (MIM: 606232). Variants in the 5' UTR of ANKRD26 (MIM: 610855) are causative of autosomal-dominant thrombocytopaenia-2<sup>22</sup> (MIM: 188000). Note that the above genes do not code for proteins similar to ANKRD17 in overall protein domain structure, aside from the presence of ankyrin repeats.

Interestingly, a *de novo* frameshift variant has been reported in the highly related ANKRD17 paralog ANKHD1, in an individual with a neurodevelopmental syndrome including speech and growth delay.<sup>23</sup> As for ANKRD17, ANKHD1 has a pLI score of 1.0 in the gnomAD database, suggesting further heterozygous pathogenic variants in ANKHD1 may yet be discovered. Notably, knockdown of *Ankhd1* in the developing mouse neocortex disrupts neurogenesis.<sup>24</sup> Although ANKRD17 and ANKHD1 have very similar protein domain organization, have high sequence identity, and have both been reported to be widely expressed,<sup>2,3,24,25</sup> the degree of redundancy between the two is unclear. Analysis of a publicly available single-cell RNA-seq (scRNA-seq) dataset of gene expression in the human telencephalon during key stages of neurogenesis<sup>26</sup> indicates broad expression of ANKRD17, including in radial glial progenitors (the neural stem cells of the cortex),

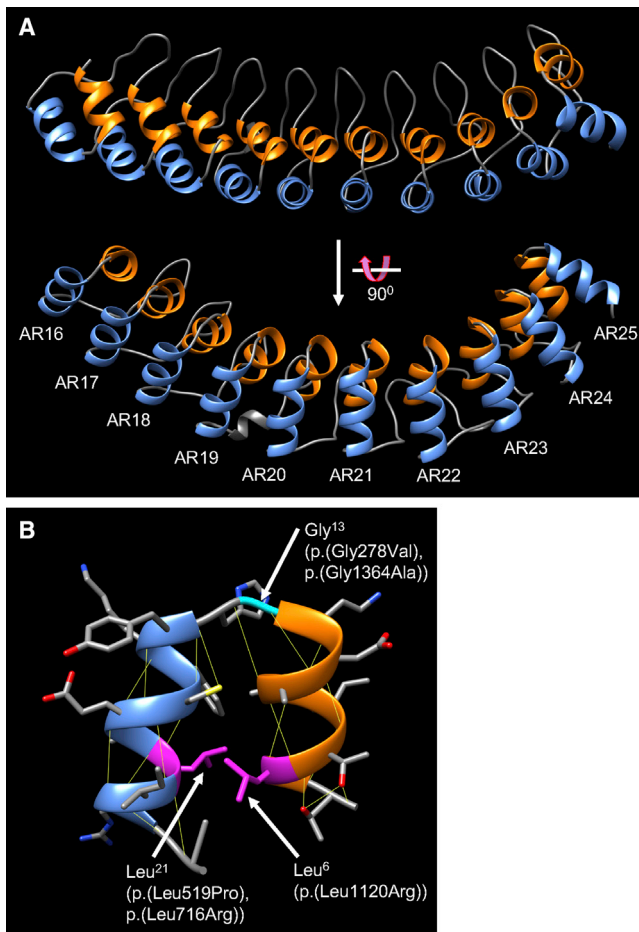

**Figure 4. Predicted three-dimensional structure of ANKRD17 ankyrin repeats and amino acids affected by missense variants**

(A) Ankyrin repeats 16–25 of human ANKRD17 (GenBank: NP\_115593) were modeled using the SWISS-MODEL homology-modeling server and visualized in UCSF Chimera. For each repeat, alpha-helix 1 is in orange and alpha-helix 2 is in blue.

(B) Detail of ANKRD17 ankyrin repeat 23, showing the positions of the invariant leucines (magenta) and glycine (cyan), which are altered at the equivalent positions in other repeats of ANKRD17 (indicated in brackets). Superscripts for Leu<sup>6</sup>, Gly<sup>13</sup>, and Leu<sup>21</sup> refer to numbering within the 30-amino acid repeating sequence presented in Figure 3. Thin yellow lines indicate predicted hydrogen bonds.

excitatory neurons, and interneurons, while *ANKHD1* expression appears more limited (Figure 5). Mask, the *Drosophila* ortholog of ANKRD17/ANKHD1, is required for survival, proliferation, and differentiation of photoreceptor progenitors<sup>27</sup> and for growth of eye and wing,<sup>4,5</sup> while overexpression of Mask in the *Drosophila* brain reduces axonal outgrowth.<sup>28</sup> The Hippo pathway is a key regulator of organ growth in animals, and its growth-promoting role is mediated by the transcriptional coactivator Yorkie in *Drosophila* or YAP in mammals. In *Drosophila*, Mask is required for expression of Yorkie target genes and for Yorkie's growth-promoting activity.<sup>4,5</sup> Yorkie/YAP can also interact with Mask/ANKHD1/ANKRD17.<sup>4,5</sup> Predominantly nuclear localization of ANKRD17 has been reported in human cell lines,<sup>2</sup> although nuclear versus cytoplasmic

distribution was shown to be cell density dependent,<sup>5</sup> and Mask/ANKHD1 have been shown to play a role in promoting nuclear import of Yorkie/YAP.<sup>29</sup> Interestingly, important roles for the Hippo pathway in brain development have been described in several animal models,<sup>30</sup> and analysis of human telencephalon scRNA-seq data suggested overlap of *YAP1* (MIM: 606608) and *ANKRD17* expression in radial glia (Figure 5), raising the possibility that the neurodevelopmental phenotypes associated with *ANKRD17* variants may be due to disruption of this pathway.

While heterozygous *Ankrd17*-deficient mice are viable and fertile, homozygous *Ankrd17* deficiency results in lethality by E11.5 due to catastrophic hemorrhages, with incomplete vascular maturation likely due to a reduction in the number of smooth muscle cells associating with endothelial tubes.<sup>3</sup> There were no clinical features suggestive of vascular abnormalities in our cohort. Given the early embryonic death of the knockout mice, central nervous system development was not studied. The development of conditional loss-of-function mouse models may shed further light on the central nervous system features of the *ANKRD17* disorder.

Several other molecular functions have been reported for ANKRD17 and its homologs. In human cell lines, ANKRD17 interacts with the cyclin E/CDK2 complex, promotes cell cycle progression, and associates with DNA replication factors and chromatin.<sup>2</sup> Interestingly, scRNA-seq data suggest that *CDK2* expression overlaps with that of *ANKRD17* in neuronal progenitors of the developing brain (Figure 5). Interaction of ANKHD1 with microRNAs via its KH domain leads to increased proliferation of renal carcinoma cells.<sup>31</sup> Previous demonstration of ANKRD17 as a binding partner of NOD2 in the NOD1/NOD2 innate immunity pathway,<sup>6</sup> and as a positive regulator of the RIG-1-like receptor-mediated signaling pathway,<sup>7</sup> suggests a plausible mechanism for the predisposition to bacterial or viral infections, respectively, identified in some individuals in our cohort. Of further relevance to immune system defects, a functional screen in *Drosophila* identified Mask as a positive regulator of cytokine receptor stability.<sup>32</sup> Also, a membrane-deformation ability has been identified for the ANKHD1 ankyrin repeats (and is also present in ANKRD17) and plays a role in promoting vesiculation during early endosome enlargement.<sup>33</sup> How the apparently diverse molecular activities of ANKRD17 family proteins are coordinated needs further exploration.

With this report, we delineate a neurodevelopmental disorder in 34 individuals caused by pathogenic variants in *ANKRD17*, most of which are *de novo*. The high frequency of truncating variants in our cohort, the structural predictions for the damaging effects of the identified missense and in-frame variants, and the known intolerance of haploinsufficiency for this gene in the general population support a strong gene-disease association. The true prevalence of this disorder in the neurodevelopmental disorder population remains to be seen. Although our cohort is relatively large, it was assembled over 3 years from

## Human telencephalon cell clusters

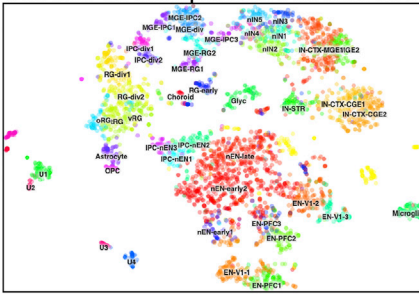

### ANKRD17

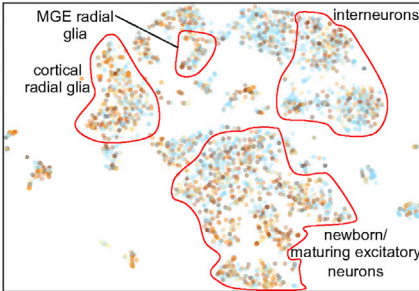

### ANKHD1

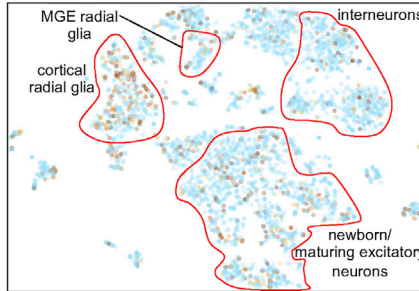

### YAP1

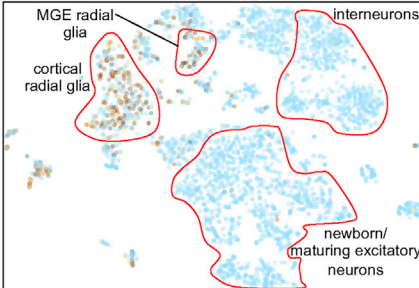

### CDK2

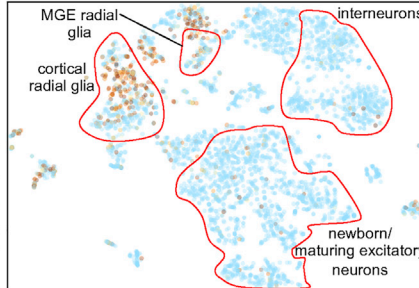

**Figure 5. Single-cell RNA-seq analysis of *ANKRD17*, *ANKHD1*, *YAP1*, and *CDK2* expression in the developing human telencephalon**

Single-cell RNA-seq data<sup>26</sup> were visualized at the UCSC Cell Browser (dataset: Cortex development). The dataset was generated from 4,261 cells obtained from the telencephalon (cortex and/or ganglionic eminences) of 48 fetuses, ranging in age from 6 to 37 post-conception weeks (pcw) (with the majority of cells from 9–16.5 pcw samples). Data are plotted using the “t-SNE on WGCNA” layout. Upper left panel indicates clusters of cell types in detail (see <https://cells.ucsc.edu/?ds=cortex-dev> for definitions). In the gene panels, the degree of brown shading in each cell represents transcript abundance, light blue shading indicates absence of detected expression, and broad categories of cell types of interest are outlined in red. MGE, medial ganglionic eminence.

multiple sources, making determination of the denominator difficult. It is hoped that with this report, more individuals with this previously unrecognized condition will be diagnosed and better prevalence estimates can be made. Although recurrent bacterial infections, cleft palate with Pierre Robin sequence, and unilateral renal agenesis are useful discriminating features, they occur in only a minority of patients. We suggest that individuals in whom a rare *ANKRD17* variant of uncertain significance is identified should be evaluated for these features, the presence of which may add weight to the interpretation of the variant as causal.

Although roles for *ANKRD17* in cell cycle progression and tissue growth have been proposed, the exact mechanism by which *ANKRD17* disruption leads to the clinical phenotype, particularly with respect to neuronal development and function, is yet to be understood. Given the previous evidence that the Mask/*ANKHD1*/*ANKRD17* family regulates the activity of Yorkie/*YAP*, it is plausible that dysregulation of the Hippo pathway contributes to the developmental features of the *ANKRD17*-related disorder. In the future, loss-of-function studies in an appropriate animal model may shed light on the precise

cell types and transcriptional outputs regulated by *ANKRD17*.

### Data and code availability

This study did not generate datasets or code.

### Supplemental information

Supplemental information can be found online at <https://doi.org/10.1016/j.ajhg.2021.04.007>.

### Consortia

The investigators of the CAUSES Study include Shelin Adam, Christele Du Souich, Alison Elliott, Anna Lehman, Jill Mwenifumbo, Tanya Nelson, Clara Van Karnebeek, and Jan Friedman.

### Acknowledgments

The authors acknowledge the individuals and families for their participation in this study and the Genomic and Bioinformatic facilities of the Institut *Imagine*. This work was supported by grants from the Agence Nationale de la Recherche (CranioRespiro project

and “Investissements d’Avenir” program [ANR-10-IAHU-01]); MSDAvenir (Devo-Decode project); The Ministry of Health and Family Welfare, Government of India (project entitled “Clinical and Molecular Characterization of Leukodystrophies in Indian Children” [V.25011/379/2015-GIA/HR]); Alabama Genomic Health Initiative (an Alabama-State earmarked project F170303004) through the University of Alabama in Birmingham; the Netherlands Organization for Health Research and Development (ZonMw grant 91718310 to T.K.); the National Human Genome Research Institute of the National Institutes of Health (award number U01HG009599); AXA (“Tete et Coeur” project); Genomics Aotearoa; and Curekids NZ.

The content of the manuscript is solely the responsibility of the authors and does not necessarily represent the official views of the National Institutes of Health. The CAUSES study is funded by Mining for Miracles, British Columbia Children’s Hospital Foundation (grant number F15-01355), and Genome British Columbia (grant number F16-02276). This work was in part generated within the European Reference Network ITHACA.

Sequencing and analysis provided by the Broad Institute of MIT and Harvard Center for Mendelian Genomics (Broad CMG) were funded by the National Human Genome Research Institute, the National Eye Institute, and the National Lung and Blood Institute grant UM1 HG008900, and in part by National Human Genome Research Institute grant R01 HG009141.

See supplemental information for DDD and 100,000 Genomes acknowledgment statements.

## Declaration of Interests

S.Y., R.W., J.J., and J. Semotok are employees of GeneDx, Inc., a wholly owned subsidiary of OPKO Health, Inc.

Received: December 20, 2020

Accepted: April 5, 2021

Published: April 27, 2021

## Web resources

CADD, <https://cadd.gs.washington.edu/>  
Clustal Omega, <http://www.ebi.ac.uk/Tools/msa/clustalo/>  
DECIPHER, <https://decipher.sanger.ac.uk/>  
GenBank, <https://www.ncbi.nlm.nih.gov/genbank/>  
GeneMatcher, <https://genematcher.org/>  
gnomAD Browser, <https://gnomad.broadinstitute.org/>  
Needleman-Wunsch global alignment, <https://blast.ncbi.nlm.nih.gov/Blast.cgi>  
OMIM, <https://www.omim.org/>  
PolyPhen-2 v.2.2.2, <http://genetics.bwh.harvard.edu/pph2/>  
SIFT v.1.03, <https://sift.bii.a-star.edu.sg/>  
SWISS-MODEL, <https://swissmodel.expasy.org/>  
UCSC Cell browser, <https://cells.ucsc.edu/?ds=cortex-dev>  
UCSC Genome Browser, <https://genome.ucsc.edu>  
UCSF Chimera, <https://www.cgl.ucsf.edu/chimera/>  
UniProtKB, <https://www.uniprot.org>

## References

- Li, J., Mahajan, A., and Tsai, M.-D. (2006). Ankyrin repeat: a unique motif mediating protein-protein interactions. *Biochemistry* 45, 15168–15178.
- Deng, M., Li, F., Ballif, B.A., Li, S., Chen, X., Guo, L., and Ye, X. (2009). Identification and functional analysis of a novel cyclin e/cdk2 substrate ankrd17. *J. Biol. Chem.* 284, 7875–7888.
- Hou, S.-C., Chan, L.-W., Chou, Y.-C., Su, C.-Y., Chen, X., Shih, Y.-L., Tsai, P.-C., Shen, C.-K.J., and Yan, Y.-T. (2009). Ankrd17, an ubiquitously expressed ankyrin factor, is essential for the vascular integrity during embryogenesis. *FEBS Lett.* 583, 2765–2771.
- Sansores-Garcia, L., Atkins, M., Moya, I.M., Shahmoradgoli, M., Tao, C., Mills, G.B., and Halder, G. (2013). Mask is required for the activity of the Hippo pathway effector Yki/YAP. *Curr. Biol.* 23, 229–235.
- Sidor, C.M., Brain, R., and Thompson, B.J. (2013). Mask proteins are cofactors of Yorkie/YAP in the Hippo pathway. *Curr. Biol.* 23, 223–228.
- Menning, M., and Kufer, T.A. (2013). A role for the Ankyrin repeat containing protein Ankrd17 in Nod1- and Nod2-mediated inflammatory responses. *FEBS Lett.* 587, 2137–2142.
- Wang, Y., Tong, X., Li, G., Li, J., Deng, M., and Ye, X. (2012). Ankrd17 positively regulates RIG-I-like receptor (RLR)-mediated immune signaling. *Eur. J. Immunol.* 42, 1304–1315.
- Karczewski, K.J., Francioli, L.C., Tiao, G., Cummings, B.B., Alfoldi, J., Wang, Q., Collins, R.L., Laricchia, K.M., Ganna, A., Birnbaum, D.P., et al.; Genome Aggregation Database Consortium (2020). The mutational constraint spectrum quantified from variation in 141,456 humans. *Nature* 581, 434–443.
- Havrilla, J.M., Pedersen, B.S., Layer, R.M., and Quinlan, A.R. (2019). A map of constrained coding regions in the human genome. *Nat. Genet.* 51, 88–95.
- Maldzienie, Ž., Vaitėnienė, E.M., Aleksūnienė, B., Utkus, A., and Preikšaitienė, E. (2020). A case report of familial 4q13.3 microdeletion in three individuals with syndromic intellectual disability. *BMC Med. Genomics* 13, 63.
- Sobreira, N., Schiettecatte, F., Valle, D., and Hamosh, A. (2015). GeneMatcher: a matching tool for connecting investigators with an interest in the same gene. *Hum. Mutat.* 36, 928–930.
- Firth, H.V., Richards, S.M., Bevan, A.P., Clayton, S., Corpas, M., Rajan, D., Van Vooren, S., Moreau, Y., Pettett, R.M., and Carter, N.P. (2009). DECIPHER: Database of Chromosomal Imbalance and Phenotype in Humans Using Ensembl Resources. *Am. J. Hum. Genet.* 84, 524–533.
- Guo, Y., Yuan, C., Tian, F., Huang, K., Weghorst, C.M., Tsai, M.-D., and Li, J. (2010). Contributions of conserved TPLH tetrapeptides to the conformational stability of ankyrin repeat proteins. *J. Mol. Biol.* 399, 168–181.
- Mosavi, L.K., Cammett, T.J., Desrosiers, D.C., and Peng, Z.Y. (2004). The ankyrin repeat as molecular architecture for protein recognition. *Protein Sci.* 13, 1435–1448.
- Jernigan, K.K., and Bordenstein, S.R. (2014). Ankyrin domains across the tree of life. *PeerJ* 2, e264.
- Krumm, N., Turner, T.N., Baker, C., Vives, L., Mohajeri, K., Witherspoon, K., Raja, A., Coe, B.P., Stessman, H.A., He, Z.-X., et al. (2015). Excess of rare, inherited truncating mutations in autism. *Nat. Genet.* 47, 582–588.
- Iossifov, I., O’Roak, B.J., Sanders, S.J., Ronemus, M., Krumm, N., Levy, D., Stessman, H.A., Witherspoon, K.T., Vives, L., Patterson, K.E., et al. (2014). The contribution of de novo coding mutations to autism spectrum disorder. *Nature* 515, 216–221.

18. De Rubeis, S., He, X., Goldberg, A.P., Poultney, C.S., Samocha, K., Cicek, A.E., Kou, Y., Liu, L., Fromer, M., Walker, S., et al.; DDD Study; Homozygosity Mapping Collaborative for Autism; and UK10K Consortium (2014). Synaptic, transcriptional and chromatin genes disrupted in autism. *Nature* *515*, 209–215.
19. Quintela, I., Barros, F., Fernandez-Prieto, M., Martinez-Regueiro, R., Castro-Gago, M., Carracedo, A., Gomez-Lado, C., and Eiris, J. (2015). Interstitial microdeletions including the chromosome band 4q13.2 and the *UBA6* gene as possible causes of intellectual disability and behavior disorder. *Am. J. Med. Genet. A* *167A*, 3113–3120.
20. Sirmaci, A., Spiliopoulos, M., Brancati, F., Powell, E., Duman, D., Abrams, A., Bademci, G., Agolini, E., Guo, S., Konuk, B., et al. (2011). Mutations in *ANKRD11* cause KBG syndrome, characterized by intellectual disability, skeletal malformations, and macrodontia. *Am. J. Hum. Genet.* *89*, 289–294.
21. Durand, C.M., Betancur, C., Boeckers, T.M., Bockmann, J., Chaste, P., Fauchereau, F., Nygren, G., Rastam, M., Gillberg, I.C., Anckarsäter, H., et al. (2007). Mutations in the gene encoding the synaptic scaffolding protein *SHANK3* are associated with autism spectrum disorders. *Nat. Genet.* *39*, 25–27.
22. Pippucci, T., Savoia, A., Perrotta, S., Pujol-Moix, N., Noris, P., Castegnaro, G., Pecci, A., Gnan, C., Punzo, F., Marconi, C., et al. (2011). Mutations in the 5' UTR of *ANKRD26*, the ankyrin repeat domain 26 gene, cause an autosomal-dominant form of inherited thrombocytopenia, *THC2*. *Am. J. Hum. Genet.* *88*, 115–120.
23. Anazi, S., Maddirevula, S., Salpietro, V., Asi, Y.T., Alshahli, S., Alhashem, A., Shamseldin, H.E., AlZahrani, F., Patel, N., Ibrahim, N., et al. (2017). Expanding the genetic heterogeneity of intellectual disability. *Hum. Genet.* *136*, 1419–1429.
24. Hermann, R. (2014). Regulation of Neural Progenitor Proliferation by *ANKHD1*. <https://archiv.ub.uni-heidelberg.de/volltextserver/16467/>.
25. Poulin, F., Brueschke, A., and Sonenberg, N. (2003). Gene fusion and overlapping reading frames in the mammalian genes for 4E-BP3 and MASK. *J. Biol. Chem.* *278*, 52290–52297.
26. Nowakowski, T.J., Bhaduri, A., Pollen, A.A., Alvarado, B., Mostajo-Radji, M.A., Di Lullo, E., Haeussler, M., Sandoval-Espinosa, C., Liu, S.J., Velmeshev, D., et al. (2017). Spatiotemporal gene expression trajectories reveal developmental hierarchies of the human cortex. *Science* *358*, 1318–1323.
27. Smith, R.K., Carroll, P.M., Allard, J.D., and Simon, M.A. (2002). MASK, a large ankyrin repeat and KH domain-containing protein involved in *Drosophila* receptor tyrosine kinase signaling. *Development* *129*, 71–82.
28. Lou, W.P.-K., Mateos, A., Koch, M., Klussman, S., Yang, C., Lu, N., Kumar, S., Limpert, S., Göpferich, M., Zschaetzsch, M., et al. (2018). Regulation of Adult CNS Axonal Regeneration by the Post-transcriptional Regulator *Cpeb1*. *Front. Mol. Neurosci.* *10*, 445.
29. Sidor, C., Borreguero-Munoz, N., Fletcher, G.C., Elbediwy, A., Guillermin, O., and Thompson, B.J. (2019). Mask family proteins *ANKHD1* and *ANKRD17* regulate YAP nuclear import and stability. *eLife* *8*, 8.
30. Fu, V., Plouffe, S.W., and Guan, K.-L. (2017). The Hippo pathway in organ development, homeostasis, and regeneration. *Curr. Opin. Cell Biol.* *49*, 99–107.
31. Fragiadaki, M., and Zeidler, M.P. (2018). Ankyrin repeat and single KH domain 1 (*ANKHD1*) drives renal cancer cell proliferation via binding to and altering a subset of miRNAs. *J. Biol. Chem.* *293*, 9570–9579.
32. Fisher, K.H., Fragiadaki, M., Pugazhendhi, D., Bausek, N., Arredondo, M.A., Thomas, S.J., Brown, S., and Zeidler, M.P. (2018). A genome-wide RNAi screen identifies MASK as a positive regulator of cytokine receptor stability. *J. Cell Sci.* *131*, jcs209551.
33. Kitamata, M., Hanawa-Suetsugu, K., Maruyama, K., and Suet-sugu, S. (2019). Membrane-Deformation Ability of *ANKHD1* Is Involved in the Early Endosome Enlargement. *iScience* *17*, 101–118.

## Supplemental information

### Heterozygous *ANKRD17* loss-of-function variants

cause a syndrome with intellectual disability,

speech delay, and dysmorphism

Maya Chopra, Meriel McEntagart, Jill Clayton-Smith, Konrad Platzer, Anju Shukla, Katta M. Girisha, Anupriya Kaur, Parneet Kaur, Rolph Pfundt, Hermine Veenstra-Knol, Grazia M.S. Mancini, Gerarda Cappuccio, Nicola Brunetti-Pierri, Fanny Kortüm, Maja Hempel, Jonas Denecke, Anna Lehman, CAUSES Study, Tjitske Kleefstra, Kyra E. Stuurman, Martina Wilke, Michelle L. Thompson, E. Martina Bebin, Emilia K. Bijlsma, Mariette J.V. Hoffer, Cacha Peeters-Scholte, Anne Slavotinek, William A. Weiss, Tiffany Yip, Ugur Hodoglugil, Amy Whittle, Janette diMonda, Juanita Neira, Sandra Yang, Amelia Kirby, Hailey Pinz, Rosan Lechner, Frank Sleutels, Ingo Helbig, Sarah McKeown, Katherine Helbig, Rebecca Willaert, Jane Juusola, Jennifer Semotok, Medard Hadonou, John Short, Genomics England Research Consortium, Naomi Yachelevich, Sajel Lala, Alberto Fernández-Jaen, Janvier Porta Pelayo, Chiara Klöckner, Susanne B. Kamphausen, Rami Abou Jamra, Maria Arelin, A. Micheil Innes, Anni Niskakoski, Sam Amin, Maggie Williams, Julie Evans, Sarah Smithson, Damian Smedley, Anna de Burca, Usha Kini, Martin B. Delatycki, Lyndon Gallacher, Alison Yeung, Lynn Pais, Michael Field, Ellenore Martin, Perrine Charles, Thomas Courtin, Boris Keren, Maria Iascone, Anna Cereda, Gemma Poke, Véronique Abadie, Christel Chalouhi, Padmini Parthasarathy, Benjamin J. Halliday, Stephen P. Robertson, Stanislas Lyonnet, Jeanne Amiel, and Christopher T. Gordon

SUPPLEMENTAL DATA

Supplemental Figure

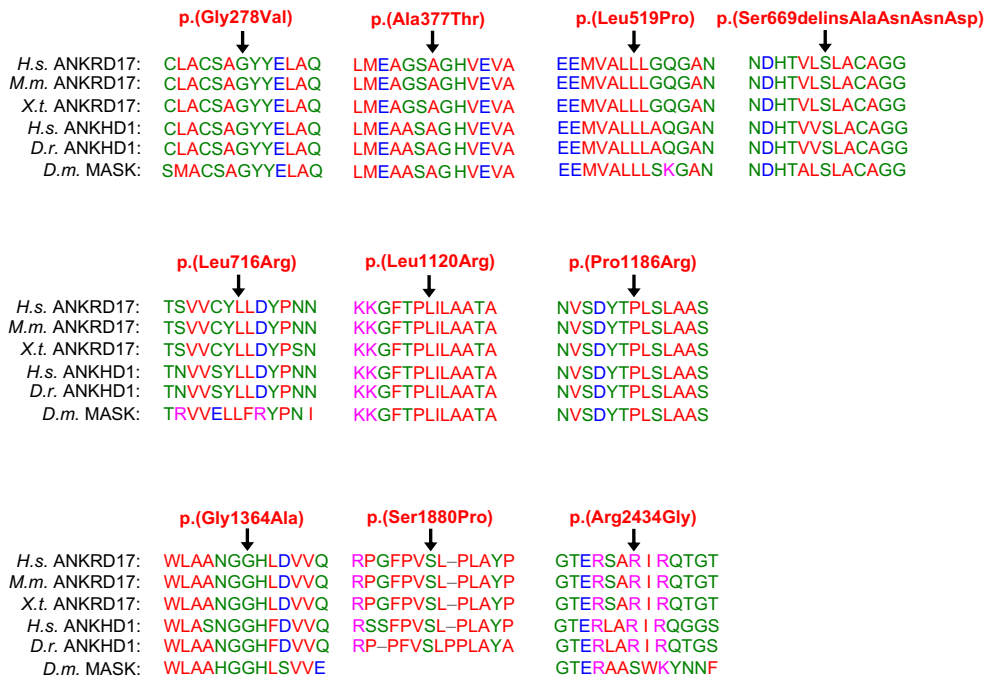

Figure S1 - ANKRD17 non-truncating variants affect highly conserved amino acids. Multiple sequence alignments of proteins homologous to ANKRD17 were performed using Clustal Omega. Arrows indicate amino acids affected by non-truncating variants. Reference sequences used for the alignment: NP\_115593, NP\_112148.2, XP\_002940399.2, NP\_060217.1, NP\_001186697.1, NP\_788733.1. *H.s.*, *Homo sapiens*; *M.m.*, *Mus musculus*; *X.t.*, *Xenopus tropicalis*; *D.r.*, *Danio rerio*; *D.m.*, *Drosophila melanogaster*.

## **Supplemental Tables**

Table S1 - phenotypic summaries of individuals 1-34. (See separate Excel spreadsheet available on-line).

Table S2 – detailed phenotypic description of individuals 1-34. (See separate Excel spreadsheet available on-line).



## Supplemental Methods

Methodology for whole exome sequencing, whole genome sequencing and array-CGH for each centre.

Written informed consent was obtained for either diagnostic or institutional review board-approved research sequencing.

**INDIVIDUAL 1:** Trio WES was performed according to a previously published protocol<sup>1</sup>.

**INDIVIDUAL 2:** Trio WES was performed according to a previously published protocol<sup>2</sup>.

**INDIVIDUALS 3 AND 9:** Trio WES was performed according to a previously published protocol<sup>3</sup>.

**INDIVIDUALS 4, 10 and 18:** Trio WES was performed according to the following protocol: DNA was enriched using Agilent SureSelect Clinical Research Exome V2 capture and paired-end sequenced on the Illumina platform (outsourced). The average coverage of the exome was ~50x. Duplicate reads were excluded. Data were demultiplexed with bcl2fastq Conversion Software from Illumina. Reads were mapped to the genome using the Burrows-Wheeler Aligner (BWA)-MEM algorithm (reference: <http://bio-bwa.sourceforge.net>). Variant detection was performed by the Genome Analysis Toolkit (GATK) HaplotypeCaller (reference <http://www.broadinstitute.org/gatk/>). The detected variants were filtered and annotated with Cartagenia software and classified with Alamut Visual.

**INDIVIDUAL 5:** Trio WES was performed according to a previously published protocol<sup>4</sup>.

**INDIVIDUAL 6:** Array-CGH (by SurePrint G3 Human CGH Microarray 4x180K Agilent Technologies) was performed on the proband. *De novo* status was established following array-CGH on the parents.

**INDIVIDUAL 7:** Trio WES was performed according to a previously published protocol<sup>5</sup>.

**INDIVIDUAL 8:** Trio exome sequencing was undertaken at Ambry Genetics under a research protocol on an Illumina sequencing platform in the CAUSES Study (approved by the University of British Columbia ethics review board). Read depth coverages for the proband and parents were 10-fold for >99% of consensus coding sequences. Reads were aligned to UCSC Genome Browser build hg19 with BWA and were called with GATK. Detected variants were annotated, filtered, and prioritized with VarSeq v1.5 (Golden Helix, Bozeman, MT, USA).

**INDIVIDUALS 11 AND 12:** Trio WGS was undertaken according to the following protocol: DNA was isolated from blood of the patient and parents using QIAasympyony (Qiagen). Sequencing libraries were constructed from whole blood genomic DNA using HudsonAlpha Clinical Sequencing Lab's custom whole genome library preparation protocol. DNA was sequenced on the Illumina HiSeq X sequencer. DNA library fragments were sequenced from both ends (paired) with a read length of 150 base pairs. Genomes were sequenced at an approximate depth of 30X, with at least 80% of base positions reaching 20X coverage. Reads were aligned and variants called according to standard protocols<sup>6,7</sup>. A robust relationship inference algorithm (KING)<sup>8</sup> was used to confirm familial relationships<sup>8</sup>. Sequenced variants were loaded into a custom software analysis application called Codicem for interpretation and variant pathogenicity was determined using American College of Medical Genetics and Genomics (ACMG) criteria. Variants were Sanger confirmed by an external CAP/CLIA laboratory (EGL Genetics, Tucker, GA).

**INDIVIDUAL 13:** Trio WES was undertaken according to the following protocol: Genomic DNA was fragmented into 200 to 500 bp fragments by means of Adaptive Focused Acoustics (Covaris Inc, Woburn, USA) shearing according to the manufacturer's protocol. Exomes were captured using the

Clinical Research Exome v2 capture library kit (Agilent, Santa Clara, USA) accompanied by Illumina paired end Sequencing on the HiSeq4000 (Illumina, San Diego, USA), generating 2 × 150 bp paired end reads with at least 80x median coverage. An in-house sequence analysis pipeline (Modular GATK-Based Variant Calling Pipeline, MAGPIE) based on read alignment using BWA-MEM and variant calling using the GATK Haplotype Caller and UnifiedGenotyper<sup>9</sup> was used to align reads and call variants on the generated BAM files. Variants were subsequently annotated using the Variant Effect Predictor<sup>10</sup>. Included annotation fields were, amongst others, variant consequence, sift scores, polyphen scores, CADD scores, and allele frequencies in the 1000 Genomes populations. An in-house developed tool additionally annotated variants using dbSNP132, gnomAD allele frequencies, and the Genome of the Netherlands frequencies (GoNL). After annotation, variants with an allele frequency of > 5% in the Genome of the Netherlands or in the 1000 Genomes project were excluded from further interpretation. LOVDplus (Leiden Genome Technology Center, LUMC, Leiden) was used for interpretation of variants.

**INDIVIDUAL 14:** Trio WES was undertaken according to the following protocol: Exon regions were targeted in extracted genomic DNA from submitted patient and family members using the xGen Whole Exome Panel kit (Integrated DNA Technologies). Targeted regions were sequenced using the Illumina HiSeq 2500 sequencing system (v3 chemistry) with 100bp paired-end reads in rapid run mode. The resulting DNA sequences were mapped to and analyzed in comparison with the published human genome (UCSC hg 19 reference sequence). Sequence variants were filtered and annotated using Ingenuity Variant Software (QIAGEN) and compared to other provided family members to search for causes of Mendelian genetic disease (de novo, homozygous, compound heterozygous and inherited heterozygous disease-causing variants).

**INDIVIDUAL 15:** Trio WES was undertaken according to the following protocol: Genomic DNA from the submitted specimen was enriched for the complete coding regions and splice site junctions for most genes of the human genome using a proprietary capture system developed by GeneDx for next generation sequencing with CNV calling (NGS-CNV). The enriched targets were simultaneously sequenced with paired end reads on an Illumina platform. Bi-directional sequence reads were assembled and aligned to reference sequences based on NCBI RefSeq transcripts and human genome build GRCh37/USCS hg 19. Using a custom-developed analysis tool (XomeAnalyzer), data were filtered and analysed to identify sequence variants and most deletions and duplications involving three or more exons.

**INDIVIDUAL 16:** Trio WES, **INDIVIDUAL 20:** Duo WES, **INDIVIDUAL 21:** Proband only WES. WES in these individuals was undertaken according to the following protocol: Using genomic DNA from the proband or proband and parent(s), the exonic regions and flanking splice junctions of the genome were captured using the IDT xGen Exome Research Panel v1.0. (Integrated DNA Technologies, Coralville IA. Massively parallel (NextGen) sequencing was done on an Illumina system with 100bp or greater paired-end reads. Reads were aligned to human genome build GRCh37/UCSC hg19, and analyzed for sequence variants using a custom-developed analysis tool.

**INDIVIDUALS 17, 26, 27 and 28:** Trio WGS was performed according to the following protocol: Using the Illumina TruSeq DNA PCR-Free sample preparation kit (Illumina, Inc.) and an Illumina HiSeq 2500 sequencer, a mean depth of 30× was generated. WGS reads were aligned using Isaac Genome Alignment Software and single variant nucleotides and indels called for chromosomes 1 to 22, X, and the mitochondrial genome using the Platypus variant caller<sup>11</sup>. Exomiser was used to identify and prioritise rare, segregating, predicted damaging variants in cases recruited with intellectual disability.

**INDIVIDUAL 19:** Trio WES was undertaken according to the following protocol: Genomic DNA was extracted from peripheral blood following standard DNA extraction protocols. After extraction of genomic DNA, targeted exons were captured with the Agilent SureSelect XT Clinical Research Exome kit (per manufacturer's protocol) and sequenced on the Illumina HiSeq 2000 or 2500 platform with

100bp paired-end reads. Mapping and analysis were based on the human genome build UCSC hg19 reference sequence. Sequencing data was processed and analyzed using an in-house custom-built bioinformatics pipeline.

**INDIVIDUAL 22:** Trio WES was undertaken according to the following protocol: Exome sequencing was performed using genomic DNA isolated from whole blood (MagnaPure24, Roche Diagnostics) from both proband and parents. Enriched libraries were prepared using KAPA HyperPlus Kit (Roche Diagnostics) and SeqCap EZ MedExome Kit (Roche Diagnostics). Sequencing was performed using massive parallel sequencing on a NextSeq550 (Illumina). The analysis of the obtained sequences was performed with the GenoSystem Variant Analysis software. This software was developed by Genologica and includes an optimized algorithm with the following features: a) Initial sequence quality control, b) Sequence filtering by elimination of indeterminacies, adapters and low quality areas, c) Second quality control of the sequences, d) Mapping on the reference genome Hg19, e) Obtaining variants and CNVs, f) Study of coverage of the mapping and g) Annotation of variants. Variant filtering and prioritization were performed with the same software. Candidate variants were evaluated based on stringent assessments at both the gene and variant levels, considering both the patient's phenotype and the inheritance pattern. Variants were classified following the guidelines of the ACMG. Identified variants were confirmed by Sanger sequencing.

**INDIVIDUALS 23 and 24:** Trio WES was performed using a BGI Exom kit (59M) for capture followed by sequencing on a BGISEQ-500, generating paired-end 100bp reads. Mapping was performed using BWA and calling with the GATK Haplotype caller. Analysis of the raw data was performed using the software Varfeed (Limbus, Rostock, Germany) and the variants were annotated and prioritized using the software Varvis (Limbus, Rostock, Germany).

**INDIVIDUAL 25:** Trio WES was performed using the IDT xGEN Exome Research Panel v1.0 with added custom clinical content and the Illumina NovaSeq 6000 platform. Samples were sequenced using 2x150 bp paired-end reads. Sequencing-derived raw image files were processed using a base-calling software (Illumina) and the sequence data was transformed into FASTQ format. Clean sequence reads of each sample were mapped to the human reference genome (GRCh37/hg19). BWA-MEM software was used for read alignment. Duplicate read marking, local realignment around indels, base quality score recalibration and variant calling were performed using GATK algorithms (Sentieon). Variant calling covered all coding regions and flanking introns with 20 bp upstream and downstream of each exon. The median exome-wide sequencing depth for the proband sample was 180x and 99.5% of target nucleotides were covered with >20x sequencing depth.

**INDIVIDUAL 29** Trio WES was performed by the Genomics Platform at the Broad Institute of MIT and Harvard. Using Twist exome capture (~38 Mb target), samples were sequenced (150 bp paired reads) to cover >80% of targets at 20x, with a mean target coverage of >100x. Exome sequencing data was processed through a pipeline based on Picard and mapping to the human genome build 38 was performed using the BWA aligner. Variants were called using GATK HaplotypeCaller package version 3.5.

**INDIVIDUALS 30, 31 and 32** Trio WES was undertaken according to the following protocol: Genomic DNA was extracted from blood samples of affected individuals and their parents. Whole-genome samples were prepared using a KAPA HyperPrep PCR-free Kit (Roche) and sequenced using a HiSeq X (Illumina) by the Kinghorn Centre for Clinical Genomics (Sydney, Australia). Sequence data was obtained in FASTQ format, with paired-ended 150 basepair reads. Alignment of reads and variant calling was processed in accordance with the GATK best practice guidelines.<sup>7,9</sup> Reads were aligned to the human reference sequence (GRCh37 assembly) using the BWA-MEM algorithm (v0.7.17). Duplicate reads were removed using Picard MarkDuplicates (v2.18.11) and outputted in BAM format using GATK (v3.8) BaseRecalibrator. GATK HaplotypeCaller was used to generate single-sample GVCFs, containing single nucleotide variants (SNVs) and short insertions/deletions (indels). Multi-

sample VCFs were produced using GATK GenotypeGVCFs and subsequently annotated with gene context information using SnpEff (v4.3S)<sup>12</sup>. Population allele frequencies from the gnomAD project (v2.1.1) were added using BCFtools annotate (v1.9)<sup>13</sup>. Variants were filtered assuming full penetrance of the causal variant. Variant sites where the variant allele fraction (VAF) in the affected individual(s) was  $\geq 0.20$ , and with an overall read depth  $\geq 8$  for all individuals in the family were included. Rare variants (gnomAD population allele frequency  $< 0.001$ ) were selected. Variants that impacted the coding sequence or a canonical splice site of a gene, based on the annotations provided by SnpEff, were included. Variants observed in homozygosity in either parent were excluded.

**INDIVIDUAL 33** Trio WES was performed according to the following protocol: Sequencing was performed using the NextSeq 500 Sequencing System (Illumina, San Diego, CA), with a  $2 \times 150$  bp high output sequencing kit after a 12-plex enrichment with SeqCap EZ MedExome kit (Roche, Basel, Switzerland), according to the manufacturer's specifications. Sequence quality was assessed with FastQC 0.11.5, then the reads were mapped using BWA-MEM (version 0.7.13), sorted and indexed in a bam file (samtools 1.4.1), duplicates were flagged (sambamba 0.6.6) and coverage was calculated (picard- tools 2.10.10). Variant calling was done with GATK 3.7 Haplotype Caller. Coverage for these samples was  $>93\%$  at a  $20\times$  depth threshold. Variants were annotated with SnpEff 4.3, dbNSFP 2.9.3, gnomAD, ClinVar, HGMD, OMIM, and an internal database. Filtering was performed with criteria based on the consequence on the protein and frequency in gnomAD.

**INDIVIDUAL 34:** Trio WES was undertaken according to a previously published protocol<sup>14</sup>.

## Supplemental acknowledgements

DDD statement: The DDD study presents independent research commissioned by the Health Innovation Challenge Fund [grant number HICF-1009-003], a parallel funding partnership between Wellcome and the Department of Health, and the Wellcome Sanger Institute [grant number WT098051]. The views expressed in this publication are those of the author(s) and not necessarily those of Wellcome or the Department of Health. The study has UK Research Ethics Committee approval (10/H0305/83, granted by the Cambridge South REC, and GEN/284/12 granted by the Republic of Ireland REC). The research team acknowledges the support of the National Institute for Health Research, through the Comprehensive Clinical Research Network. This study makes use of DECIPHER (<https://decipher.sanger.ac.uk>), which is funded by Wellcome.

100,000 Genomes Project statement: This research was made possible through access to data and findings generated by the 100,000 Genomes Project. The 100,000 Genomes Project is managed by Genomics England Limited (a wholly owned company of the Department of Health and Social Care). The 100,000 Genomes Project is funded by the National Institute for Health Research and NHS England. The Wellcome Trust, Cancer Research UK and the Medical Research Council have also funded research infrastructure. The 100,000 Genomes Project uses data provided by individuals and collected by the National Health Service as part of their care and support.

## Supplemental References

1. Gordon, C.T., Petit, F., Kroisel, P.M., Jakobsen, L., Zechi-Ceide, R.M., Oufadem, M., Bole-Feyssot, C., Pruvost, S., Masson, C., Tores, F., et al. (2013). Mutations in Endothelin 1 Cause Recessive Auriculocondylar Syndrome and Dominant Isolated Question-Mark Ears. *The American Journal of Human Genetics* 93, 1118–1125.
2. Girisha, K.M., Shukla, A., Trujillano, D., Bhavani, G.S., Hebbar, M., Kadavigere, R., and Rolfs, A. (2016). A homozygous nonsense variant in IFT52 is associated with a human skeletal ciliopathy. *Clin. Genet.* 90, 536–539.
3. de Ligt, J., Willemsen, M.H., van Bon, B.W.M., Kleefstra, T., Yntema, H.G., Kroes, T., Vulto-van Silfhout, A.T., Koolen, D.A., de Vries, P., Gilissen, C., et al. (2012). Diagnostic exome sequencing in persons with severe intellectual disability. *N. Engl. J. Med.* 367, 1921–1929.
4. Deciphering Developmental Disorders Study (2015). Large-scale discovery of novel genetic causes of developmental disorders. *Nature* 519, 223–228.
5. Hempel, M., Cremer, K., Ockeloen, C.W., Lichtenbelt, K.D., Herkert, J.C., Denecke, J., Haack, T.B., Zink, A.M., Becker, J., Wohlleber, E., et al. (2015). De Novo Mutations in CHAMP1 Cause Intellectual Disability with Severe Speech Impairment. *Am. J. Hum. Genet.* 97, 493–500.
6. Li, H., and Durbin, R. (2009). Fast and accurate short read alignment with Burrows-Wheeler transform. *Bioinformatics* 25, 1754–1760.
7. DePristo, M.A., Banks, E., Poplin, R., Garimella, K.V., Maguire, J.R., Hartl, C., Philippakis, A.A., del Angel, G., Rivas, M.A., Hanna, M., et al. (2011). A framework for variation

discovery and genotyping using next-generation DNA sequencing data. *Nat Genet* 43, 491–498.

8. Manichaikul, A., Mychaleckyj, J.C., Rich, S.S., Daly, K., Sale, M., and Chen, W.-M. (2010). Robust relationship inference in genome-wide association studies. *Bioinformatics* 26, 2867–2873.

9. McKenna, A., Hanna, M., Banks, E., Sivachenko, A., Cibulskis, K., Kernytsky, A., Garimella, K., Altshuler, D., Gabriel, S., Daly, M., et al. (2010). The Genome Analysis Toolkit: a MapReduce framework for analyzing next-generation DNA sequencing data. *Genome Res* 20, 1297–1303.

10. McLaren, W., Gil, L., Hunt, S.E., Riat, H.S., Ritchie, G.R.S., Thormann, A., Flicek, P., and Cunningham, F. (2016). The Ensembl Variant Effect Predictor. *Genome Biol* 17, 122.

11. Wei, W., Tuna, S., Keogh, M.J., Smith, K.R., Aitman, T.J., Beales, P.L., Bennett, D.L., Gale, D.P., Bitner-Glindzicz, M.A.K., Black, G.C., et al. (2019). Germline selection shapes human mitochondrial DNA diversity. *Science* 364, 1–12.

12. Cingolani, P., Platts, A., Wang, L.L., Coon, M., Nguyen, T., Wang, L., Land, S.J., Lu, X., and Ruden, D.M. (2012). A program for annotating and predicting the effects of single nucleotide polymorphisms, SnpEff: SNPs in the genome of *Drosophila melanogaster* strain w1118; iso-2; iso-3. *Fly (Austin)* 6, 80–92.

13. Karczewski, K.J., Francioli, L.C., Tiao, G., Cummings, B.B., Alföldi, J., Wang, Q., Collins, R.L., Laricchia, K.M., Ganna, A., Birnbaum, D.P., et al. (2020). The mutational constraint spectrum quantified from variation in 141,456 humans. *Nature* 581, 434–443.

14. Pezzani, L., Marchetti, D., Cereda, A., Caffi, L.G., Manara, O., Mamoli, D., Pezzoli, L., Lincesso, A.R., Perego, L., Pelliccioli, I., et al. (2018). Atypical presentation of pediatric BRAF RASopathy with acute encephalopathy. *Am J Med Genet A* 176, 2867–2871.
